# Supplementary material for: Synthesis, biological activity and multiscale molecular modeling studies for coumaryl-carboxamide derivatives as selective carbonic anhydrase IX inhibitors
Source: PubMed Central journal article supplement (PMC6009903; doi:10.1080/14756366.2017.1354857), 2017-08-04

# Synthesis, Biological Activity and Multiscale Molecular Modeling Studies for Coumaryl-carboxamid Derivatives as Selective Carbonic Anhydrase IX Inhibitors

## SUPPLEMENTARY MATERIALS

|                                                                                                        |      |
|--------------------------------------------------------------------------------------------------------|------|
| <sup>1</sup> H and <sup>13</sup> C NMR and MS spectra of <b>c</b> , <b>d</b> , and <b>e1-e20</b> ..... | 2-34 |
|--------------------------------------------------------------------------------------------------------|------|

S1:  $^1\text{H}$  NMR ( $\text{CDCl}_3$ ) and  $^{13}\text{C}$  NMR ( $\text{DMSO-}d_6$ ) spectra of **c**

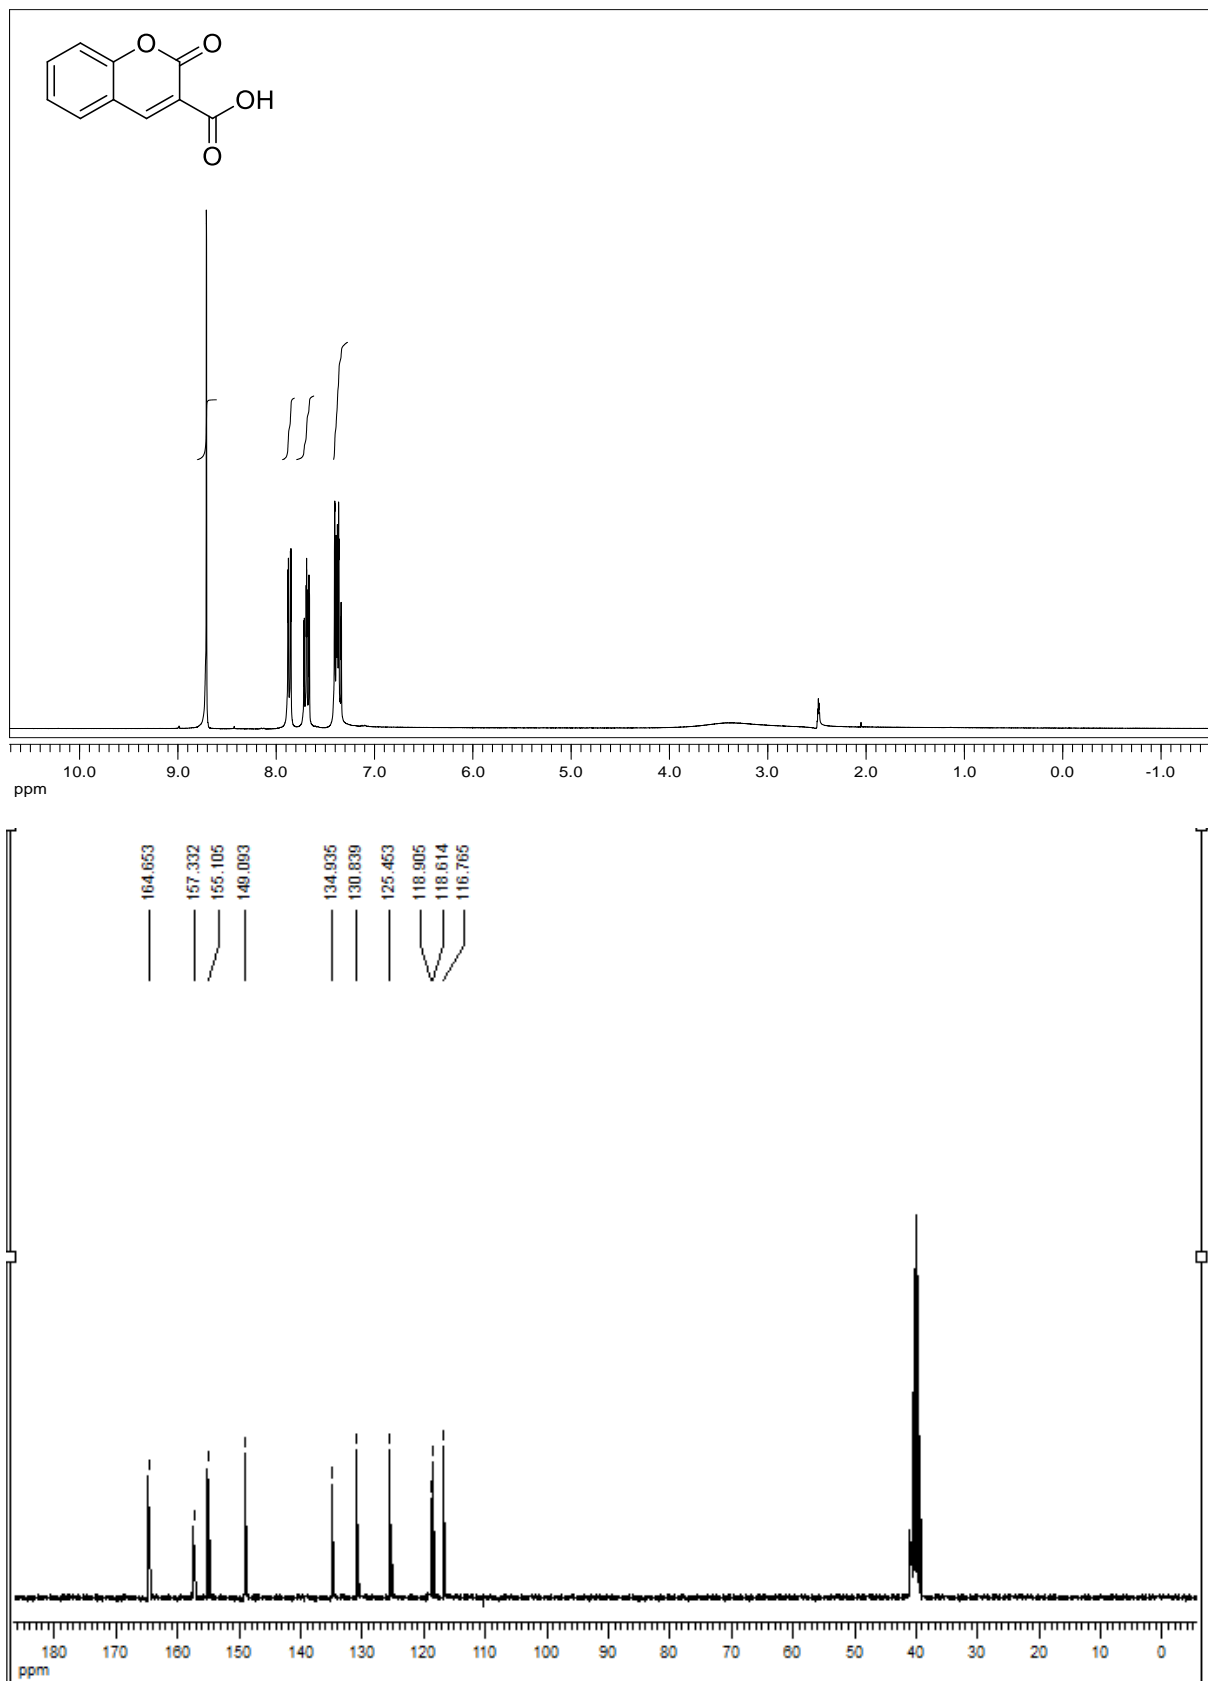

S2:  $^1\text{H}$  NMR ( $\text{CDCl}_3$ ) and  $^{13}\text{C}$  NMR ( $\text{DMSO}-d_6$ ) spectra of **d**

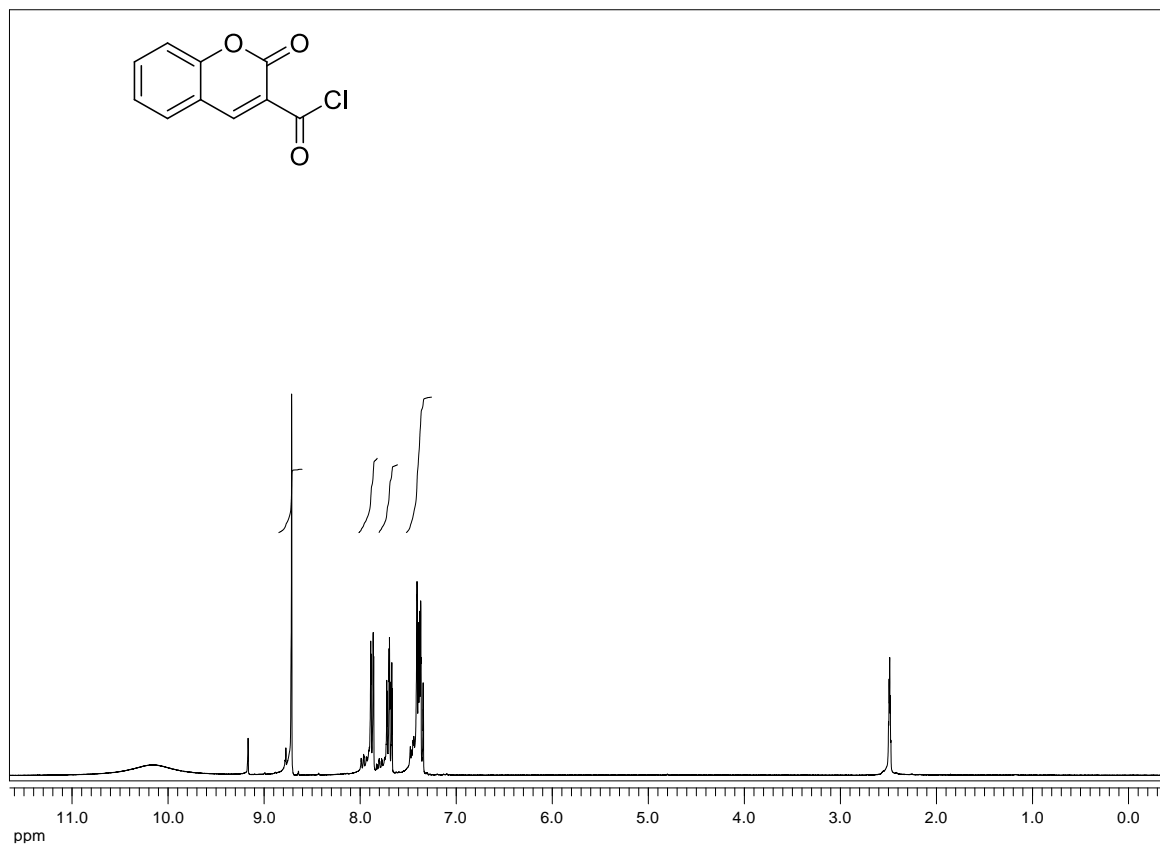

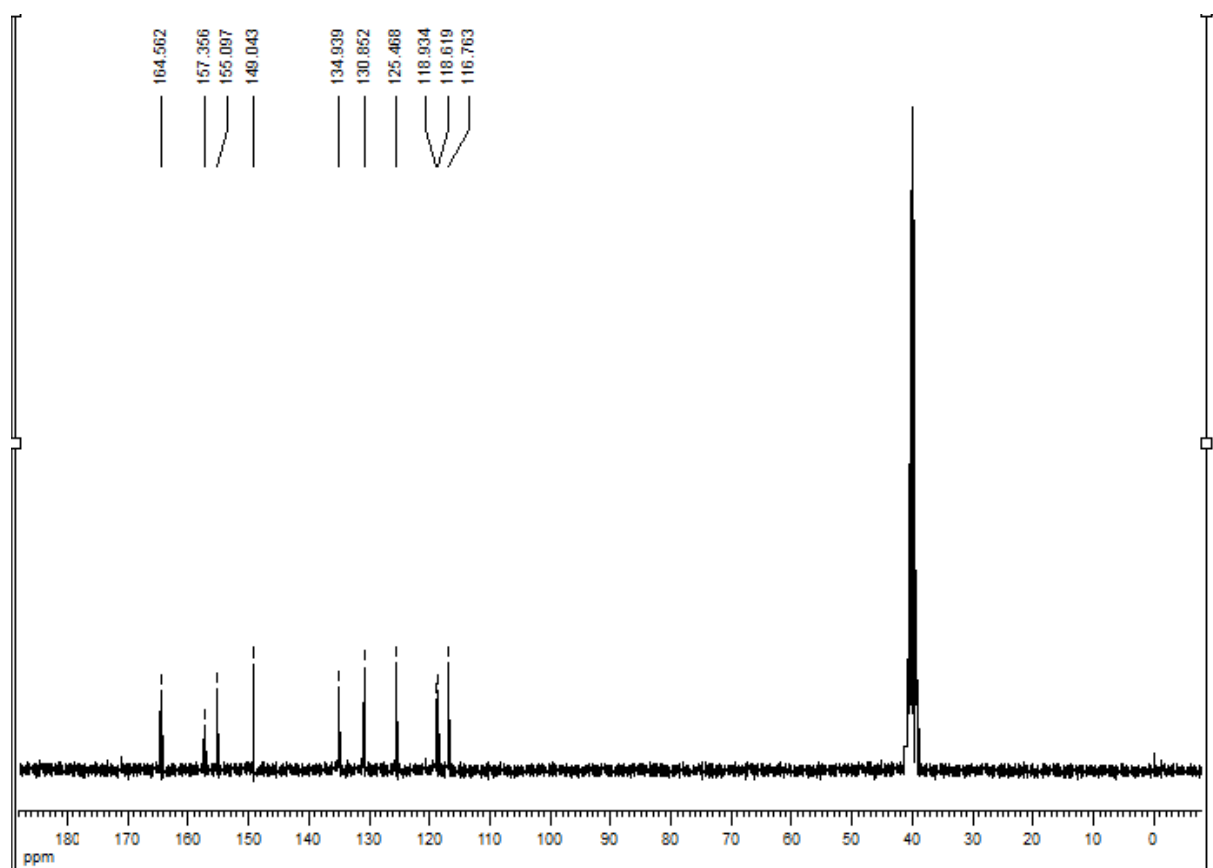

**S3:**  $^1\text{H}$  NMR ( $\text{CDCl}_3$ ),  $^{13}\text{C}$  NMR ( $\text{DMSO}-d_6$ ) and MS spectra of **e1**

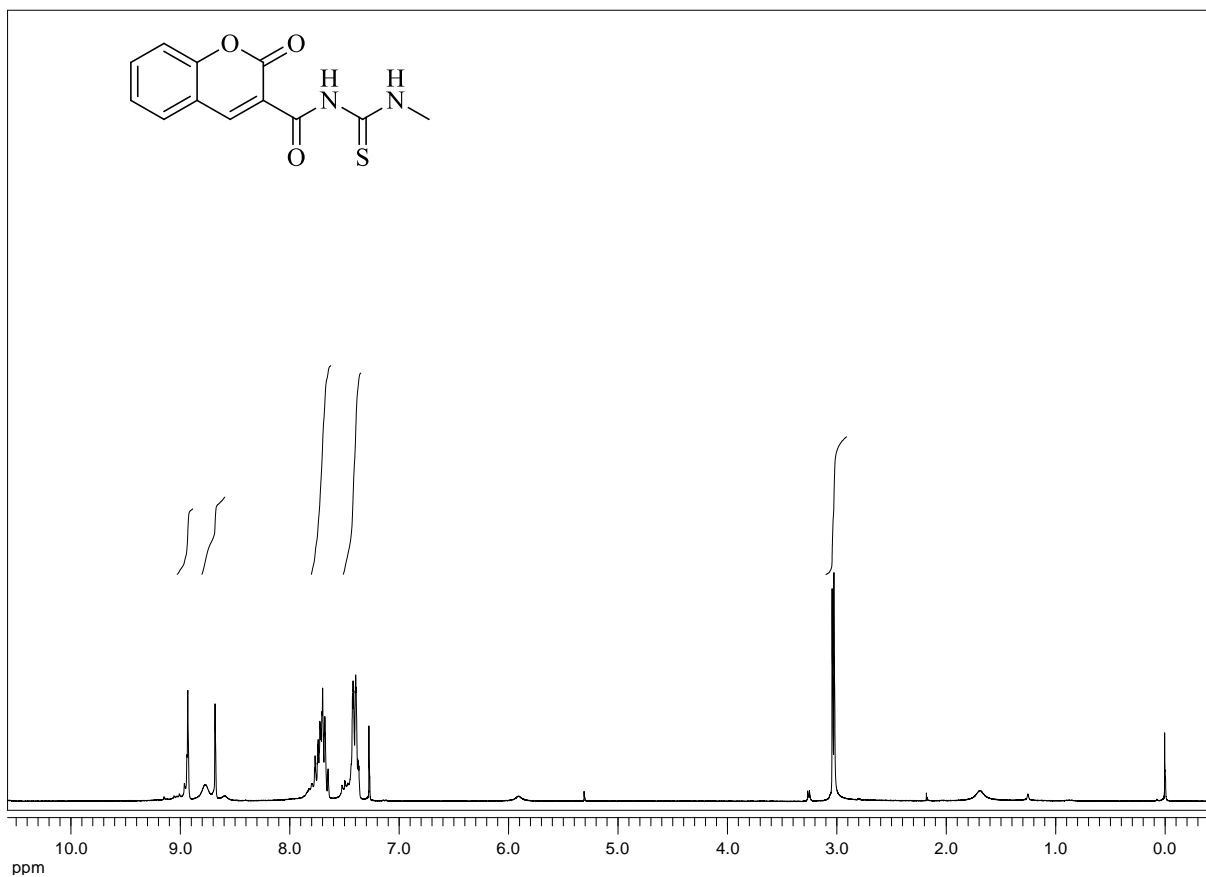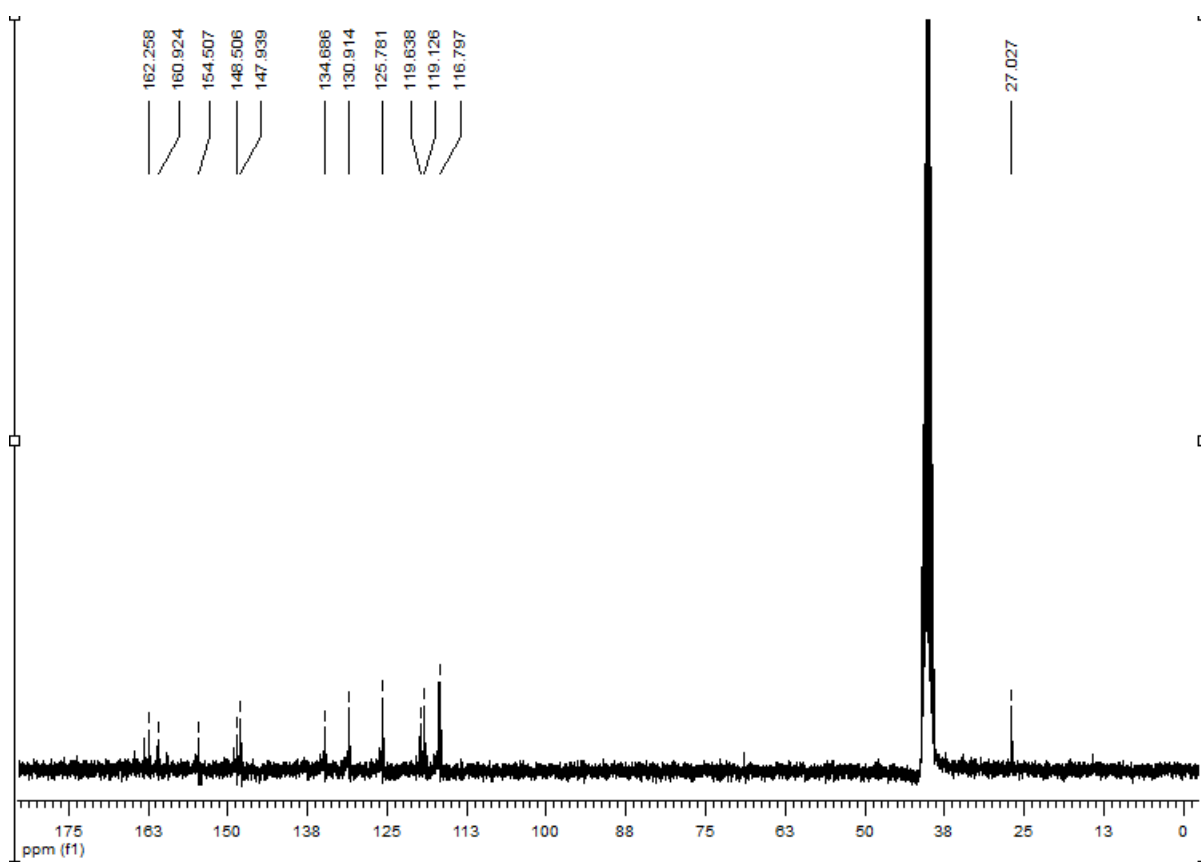

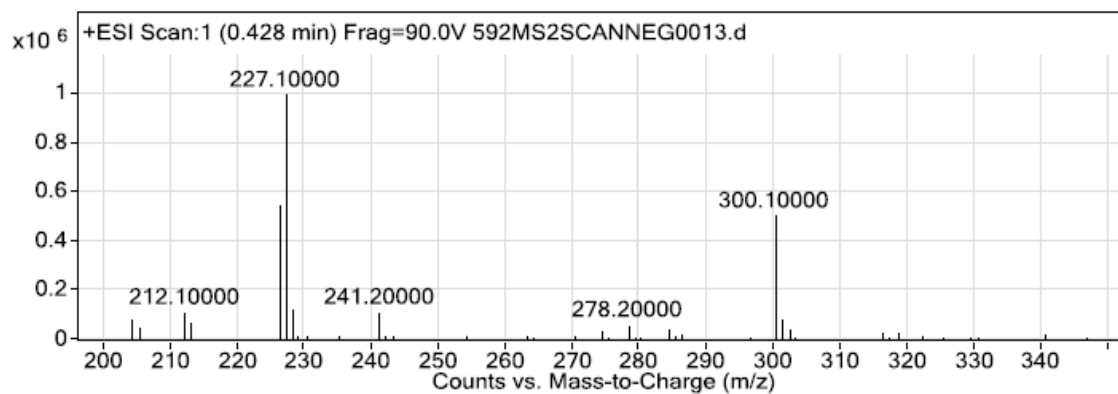

S4:  $^1\text{H}$  NMR ( $\text{CDCl}_3$ ),  $^{13}\text{C}$  NMR ( $\text{CDCl}_3$ ) and MS spectra of **e2**

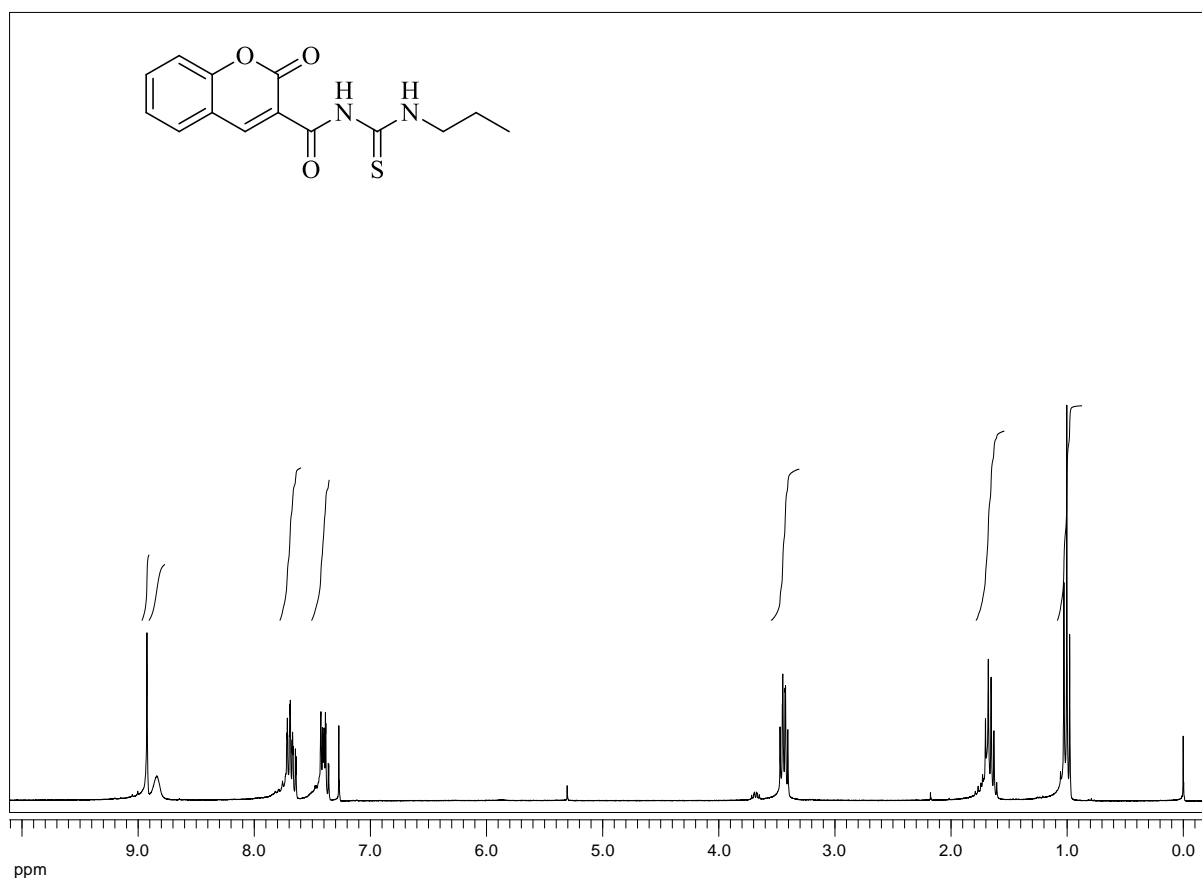

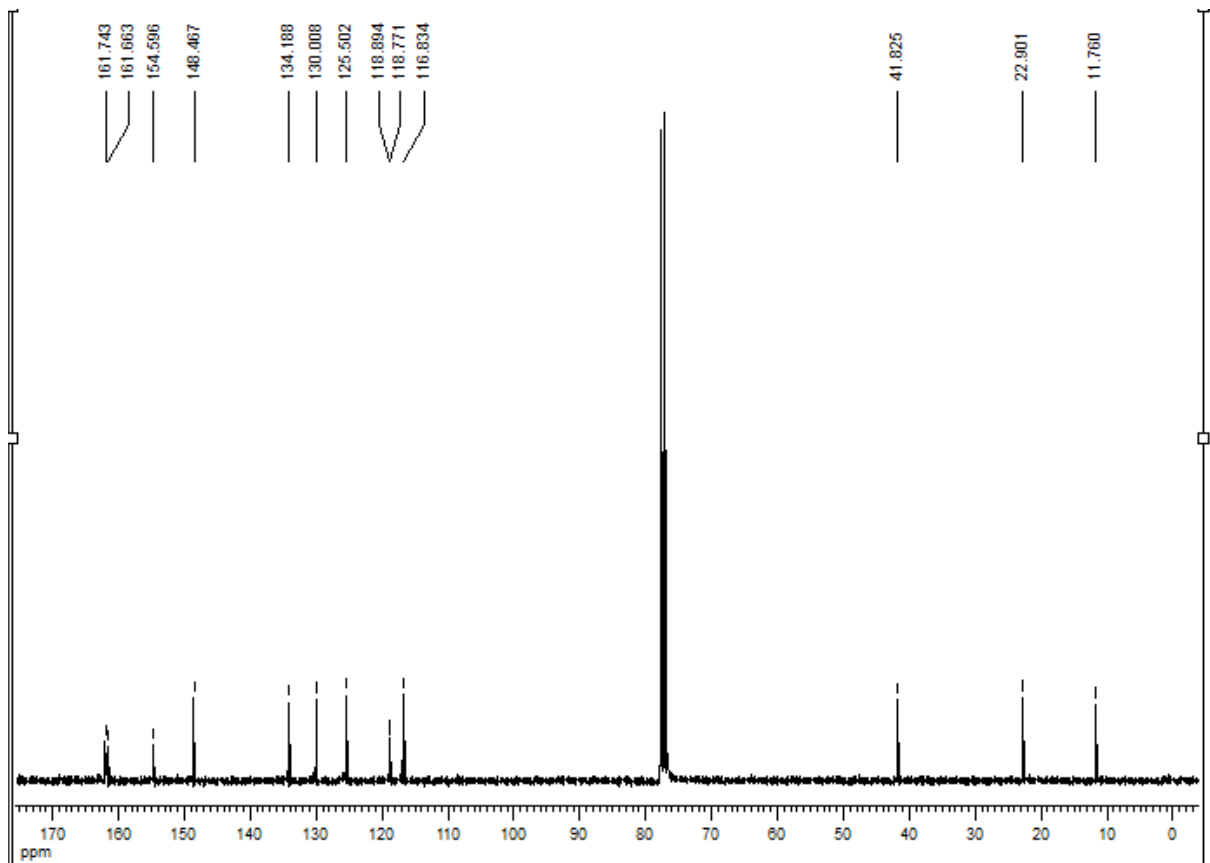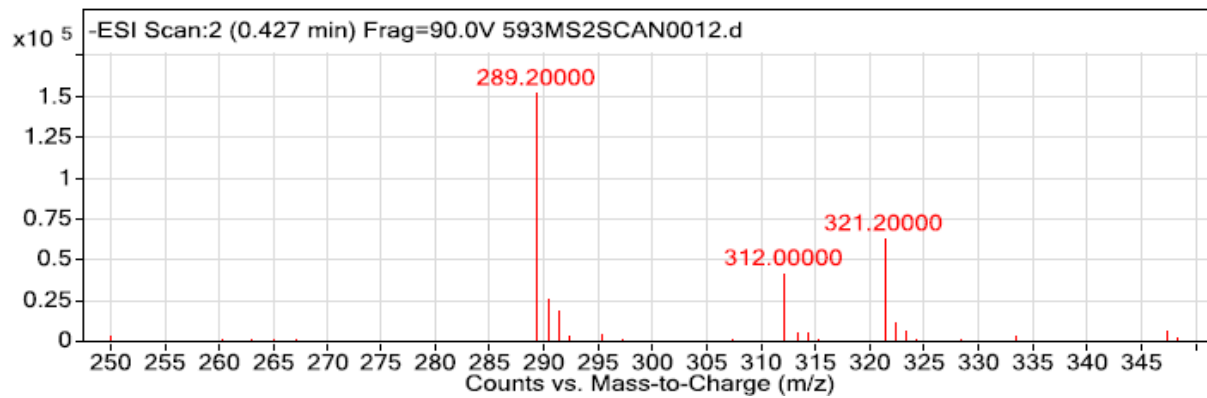

S5:  $^1\text{H}$  NMR ( $\text{CDCl}_3$ ),  $^{13}\text{C}$  NMR ( $\text{CDCl}_3$ ) and MS spectra of **e3**

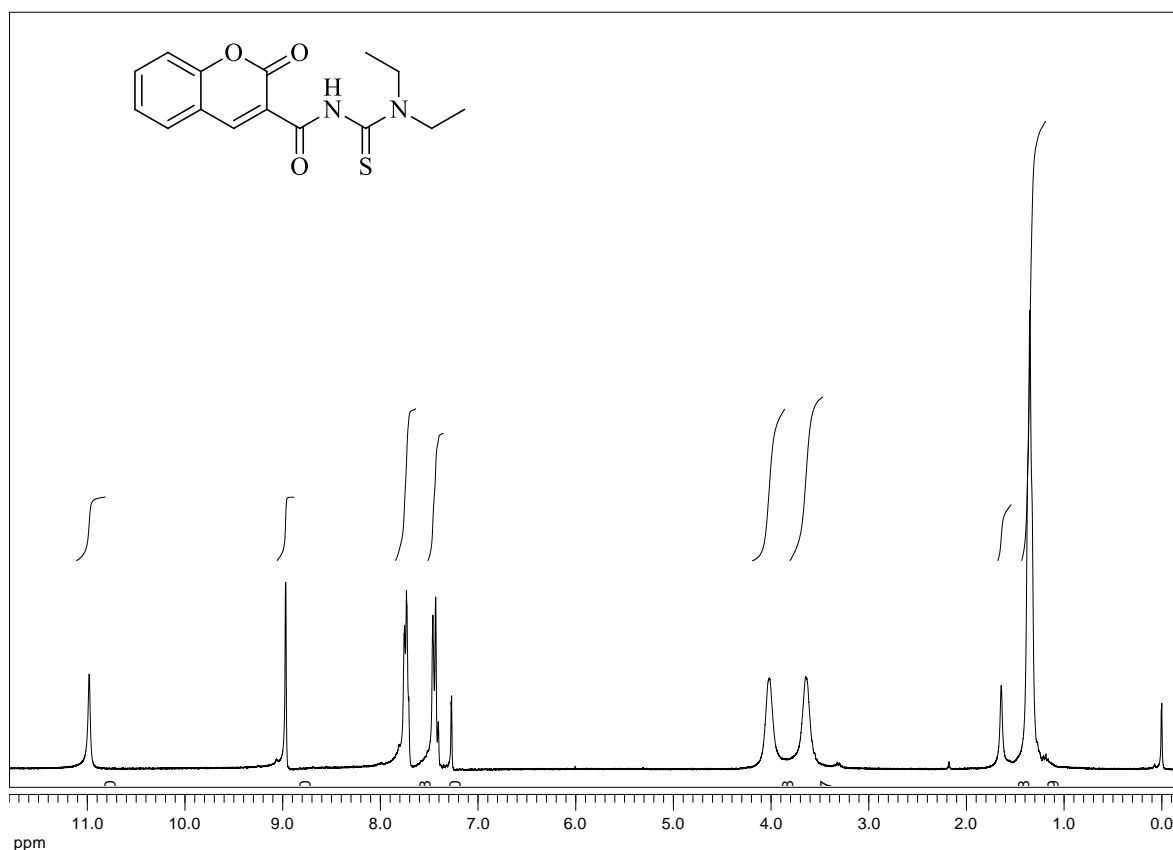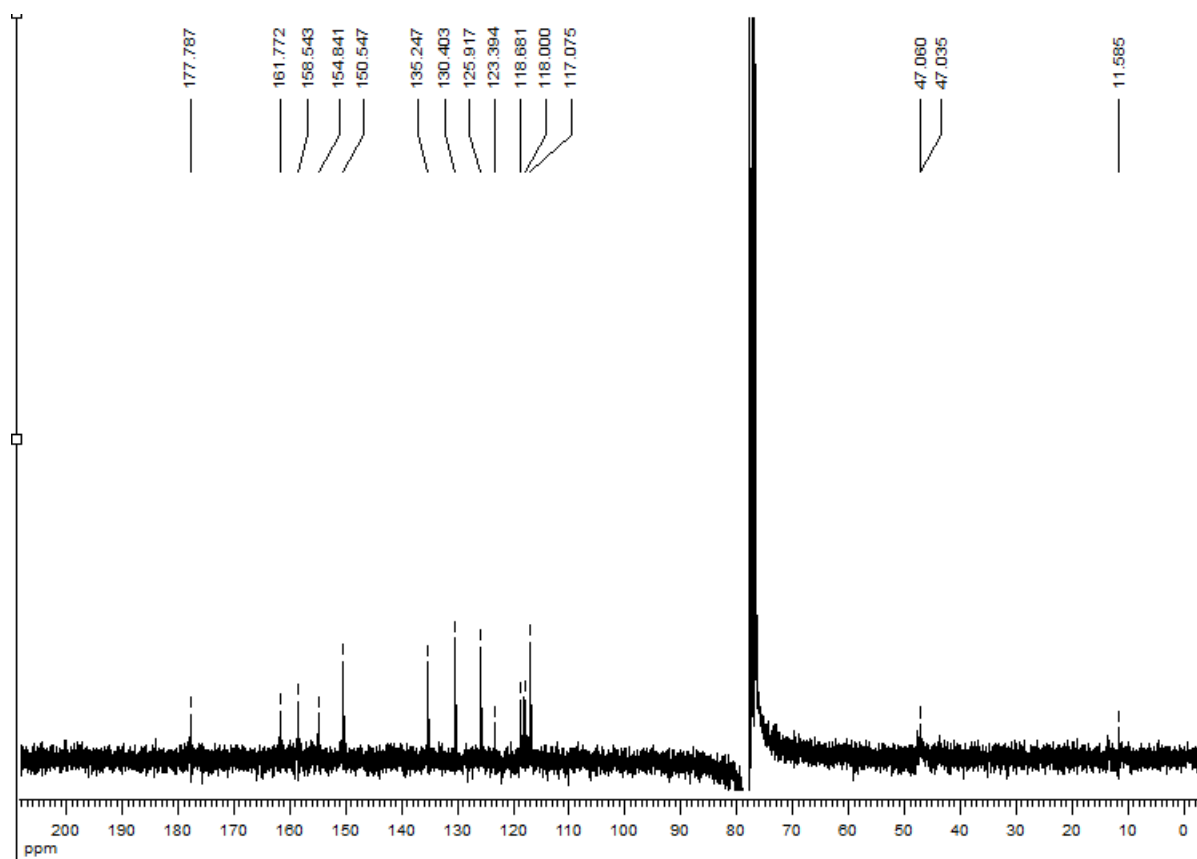



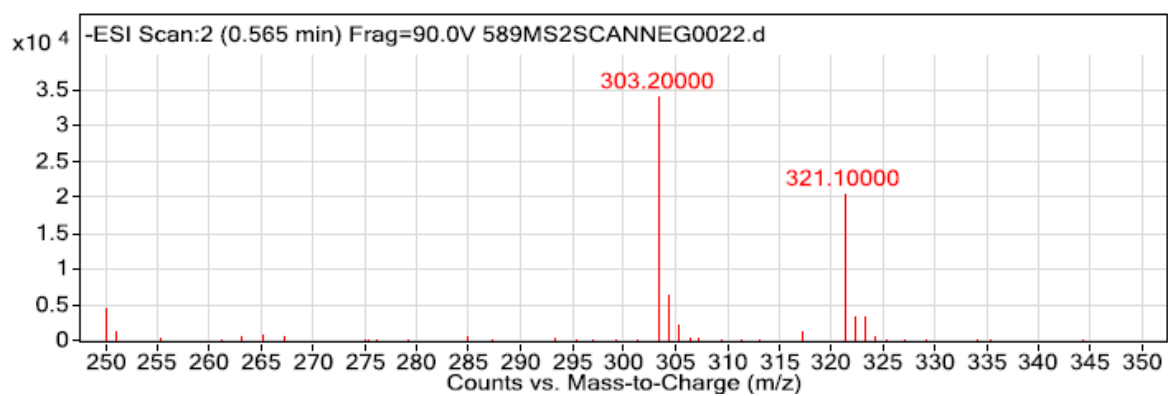

**S6:** <sup>1</sup>H NMR (CDCl<sub>3</sub>), <sup>13</sup>C NMR (CDCl<sub>3</sub>) and MS spectra of **e4**

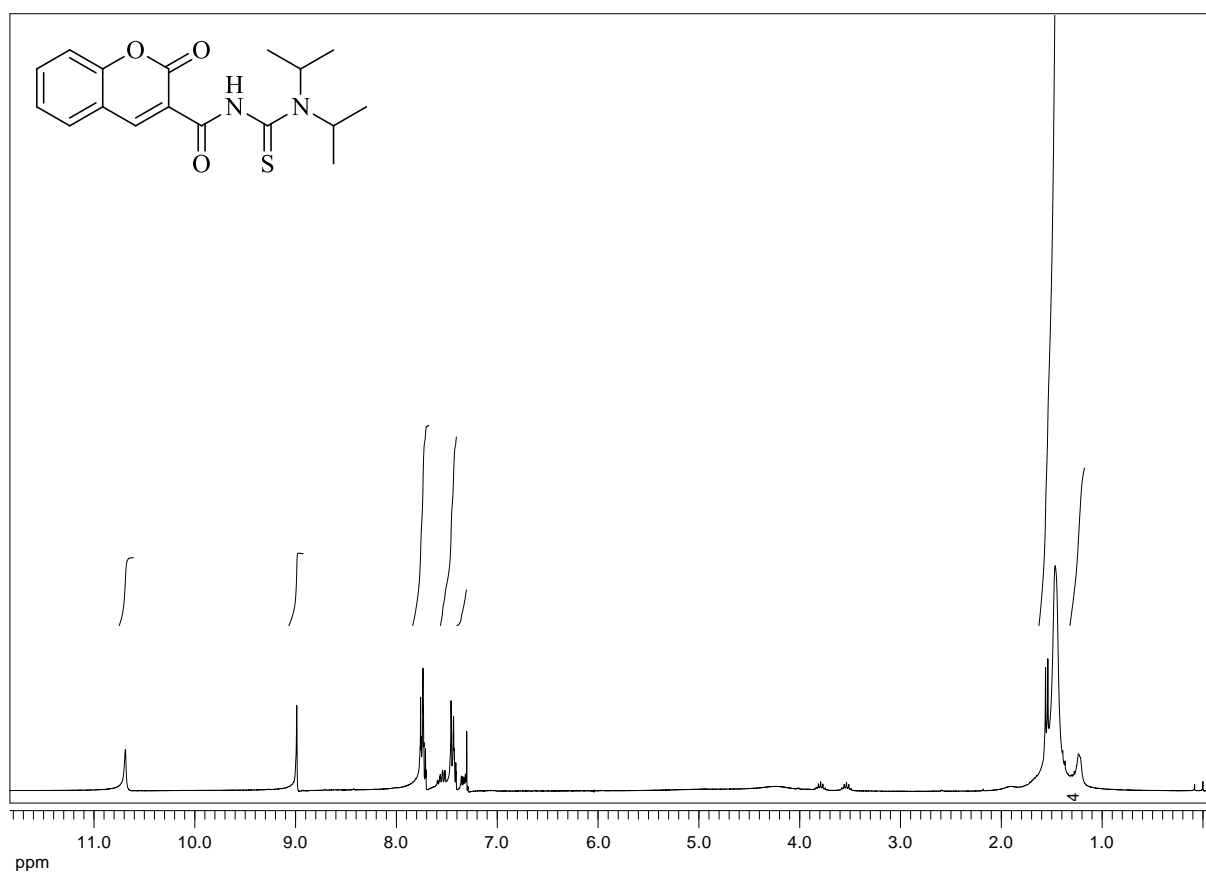

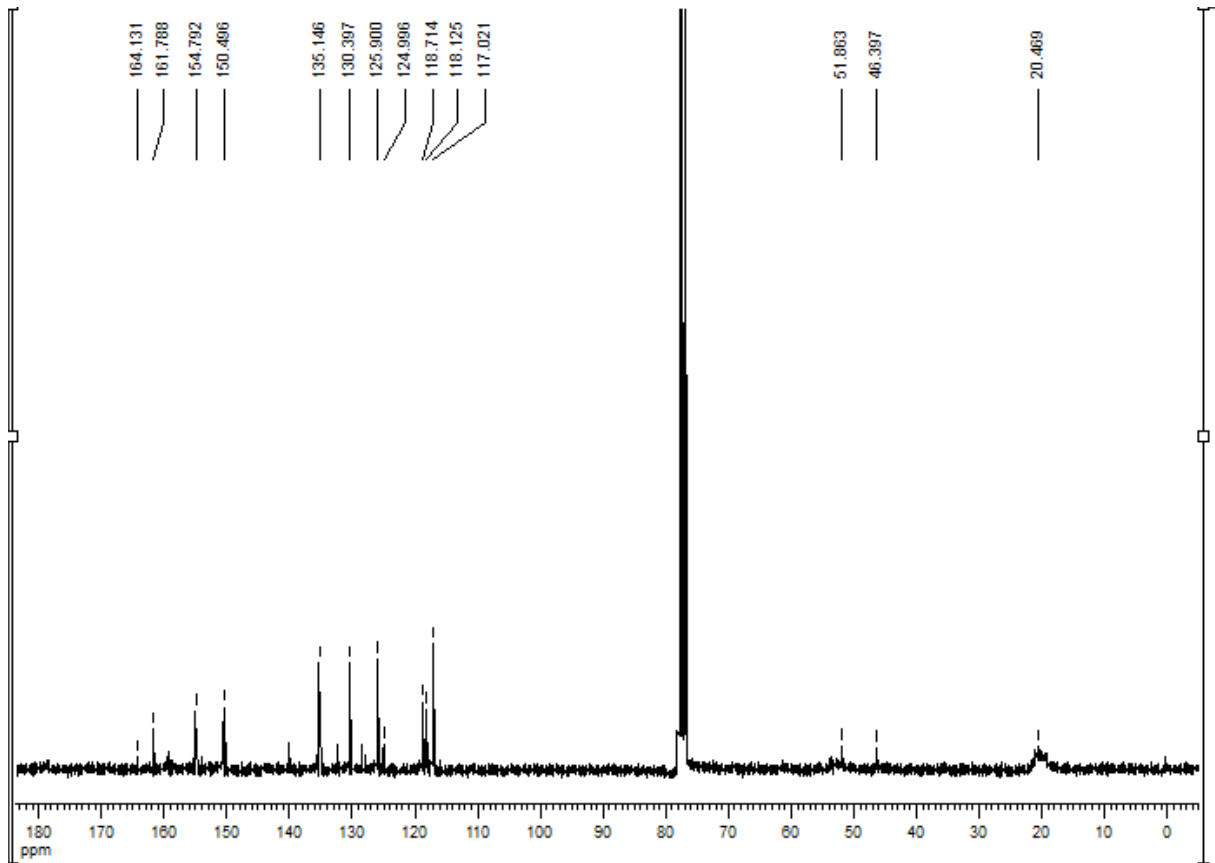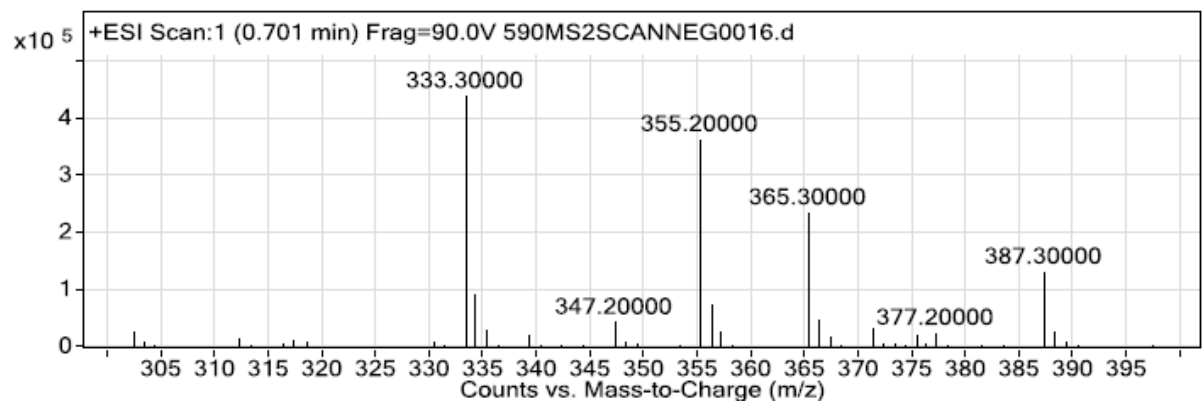

S7:  $^1\text{H}$  NMR ( $\text{CDCl}_3$ ),  $^{13}\text{C}$  NMR ( $\text{CDCl}_3$ ) and MS spectra of e5

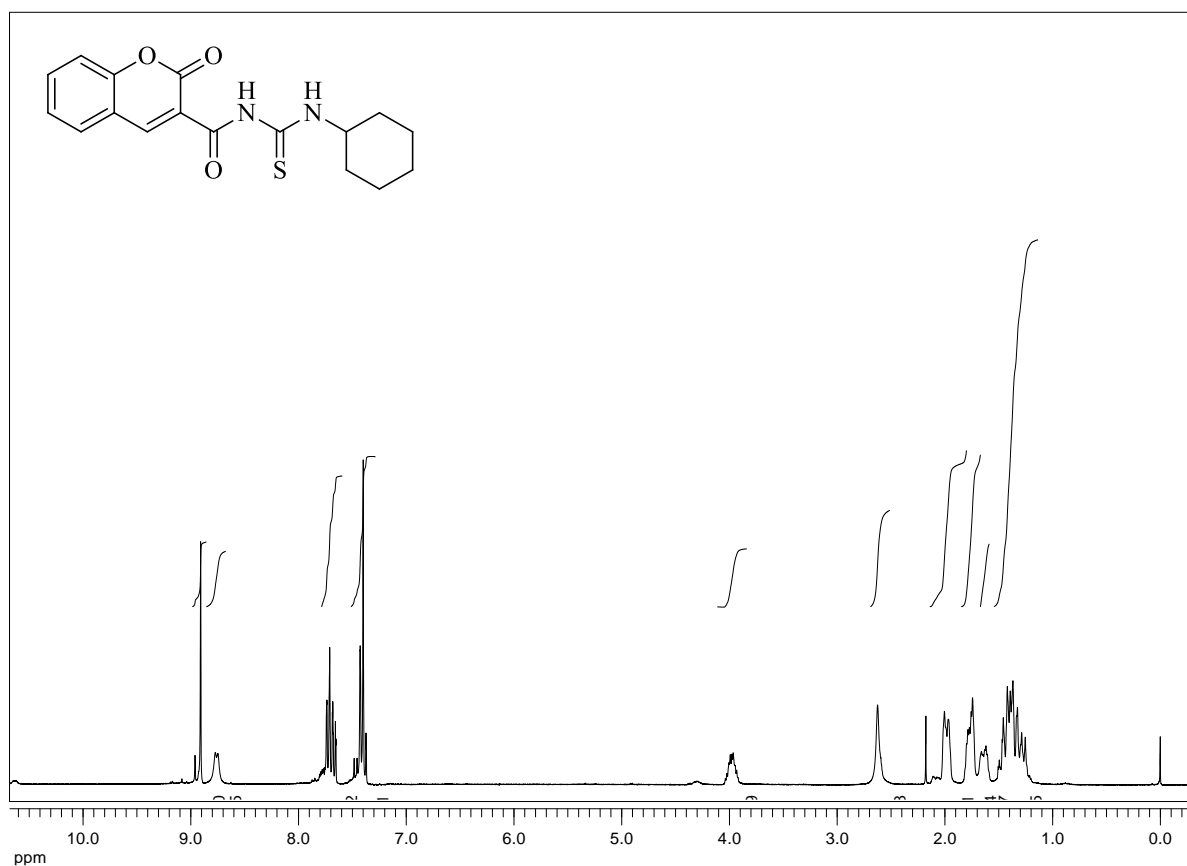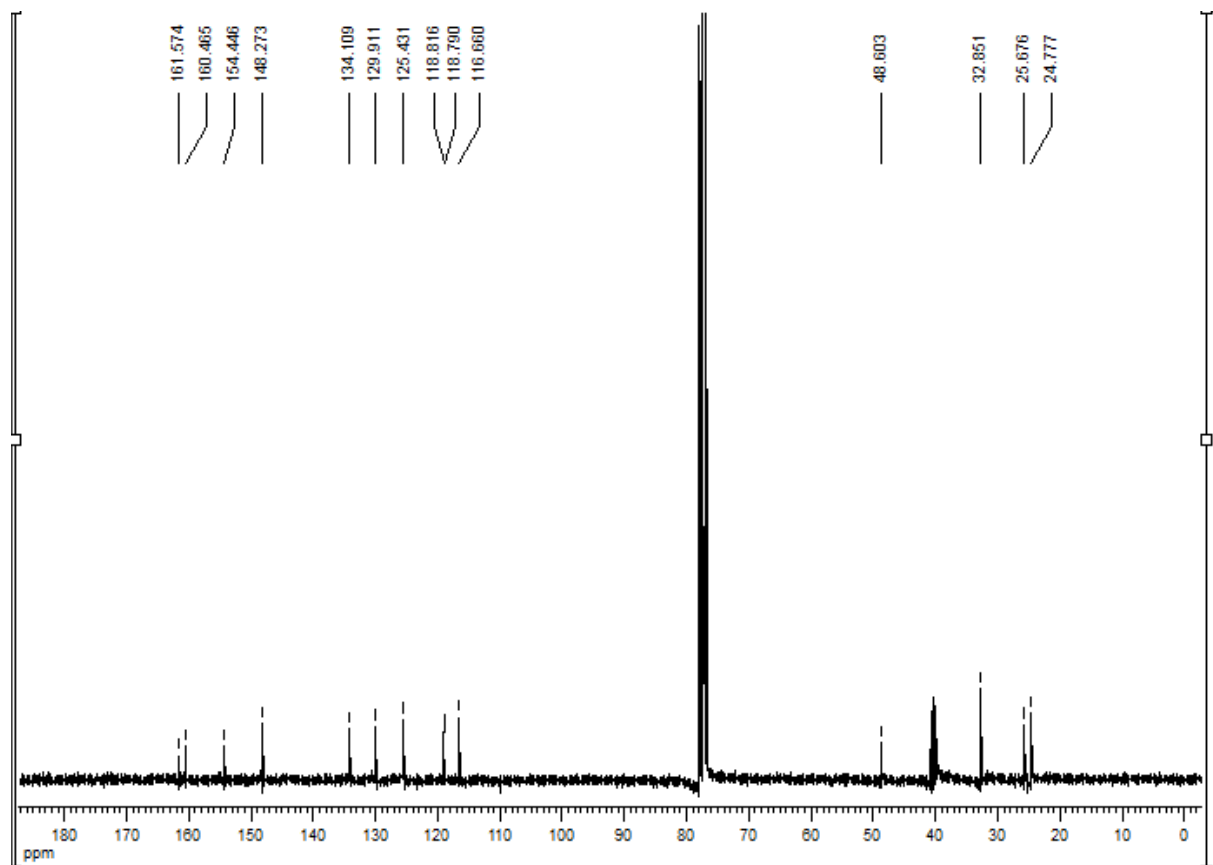

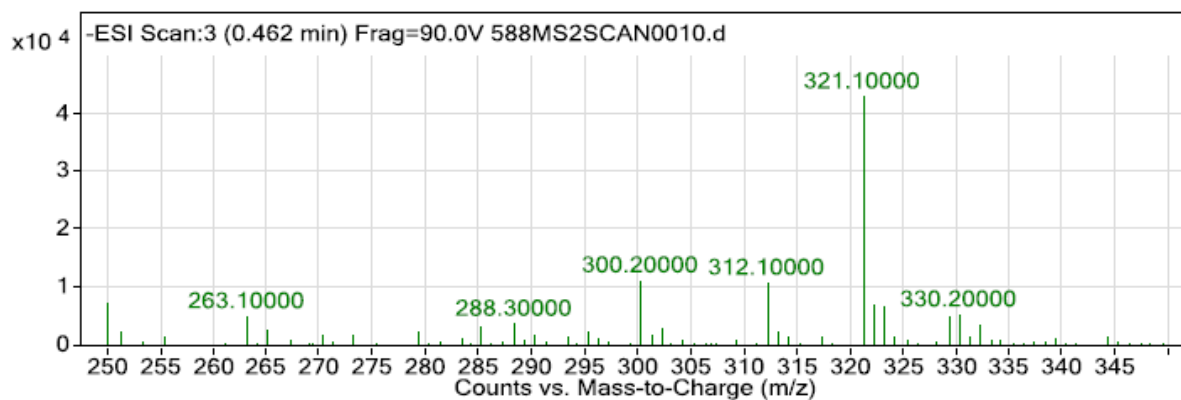

**S8:** <sup>1</sup>H NMR (CDCl<sub>3</sub>), <sup>13</sup>C NMR (CDCl<sub>3</sub>) and MS spectra of **e6**

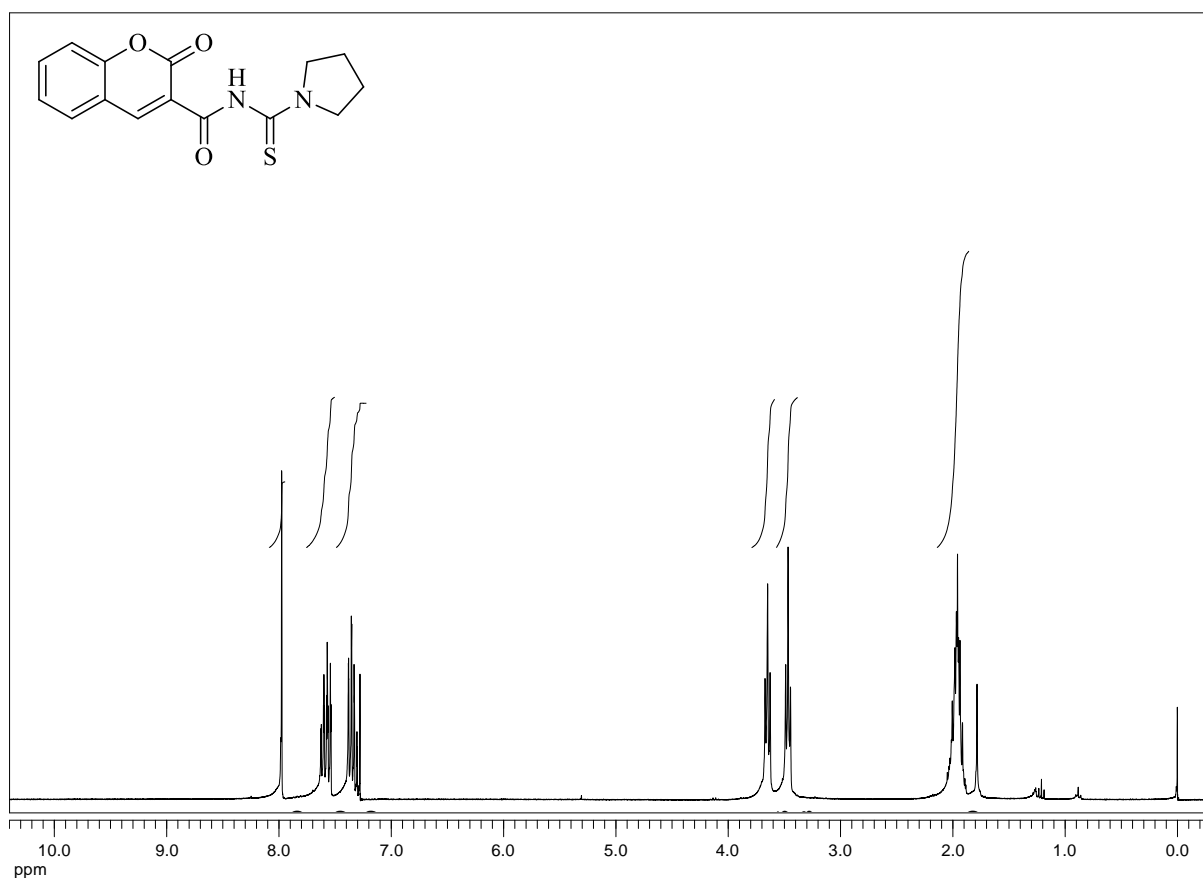

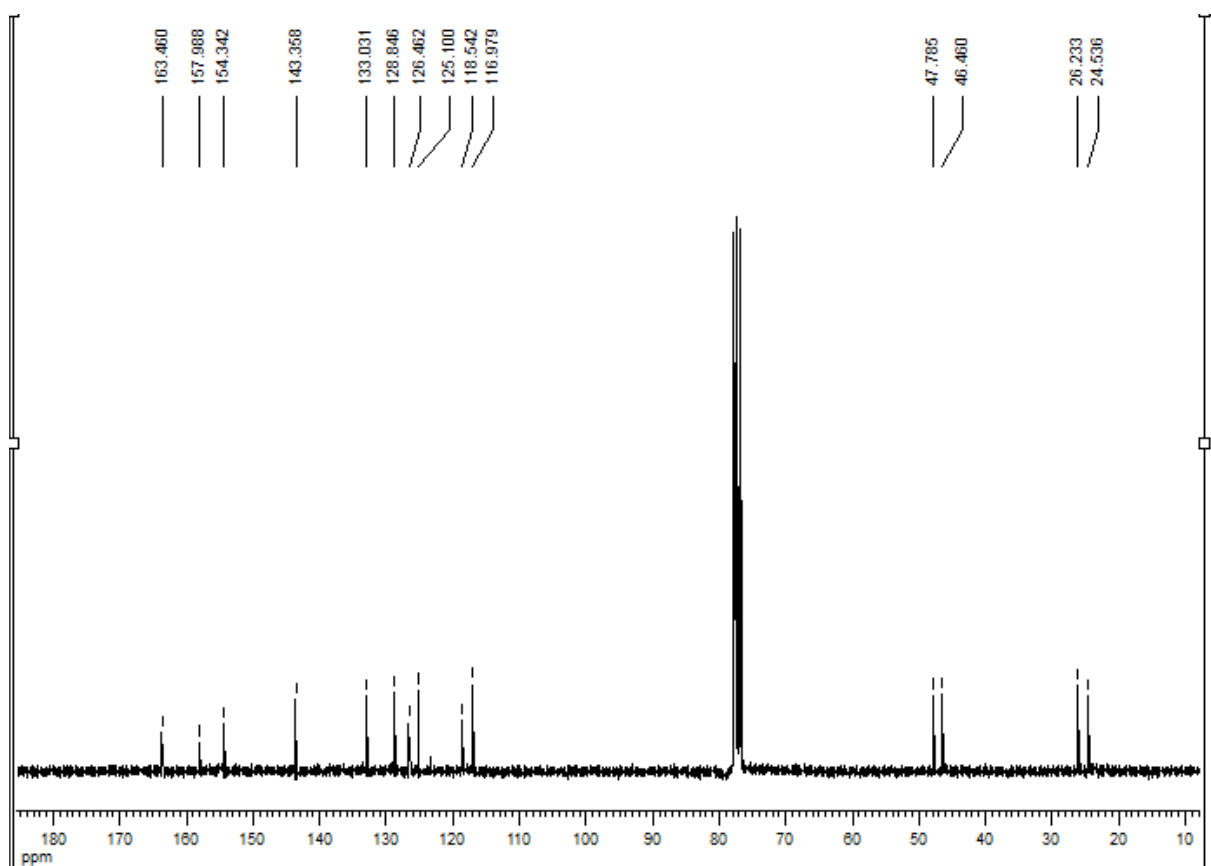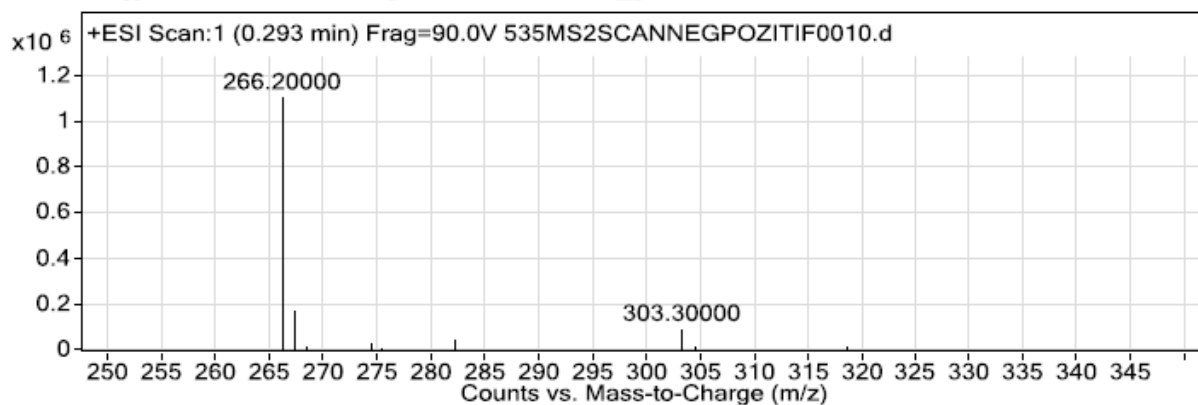

S9:  $^1\text{H}$  NMR ( $\text{CDCl}_3$ ),  $^{13}\text{C}$  NMR ( $\text{CDCl}_3$ ) and MS spectra of e7

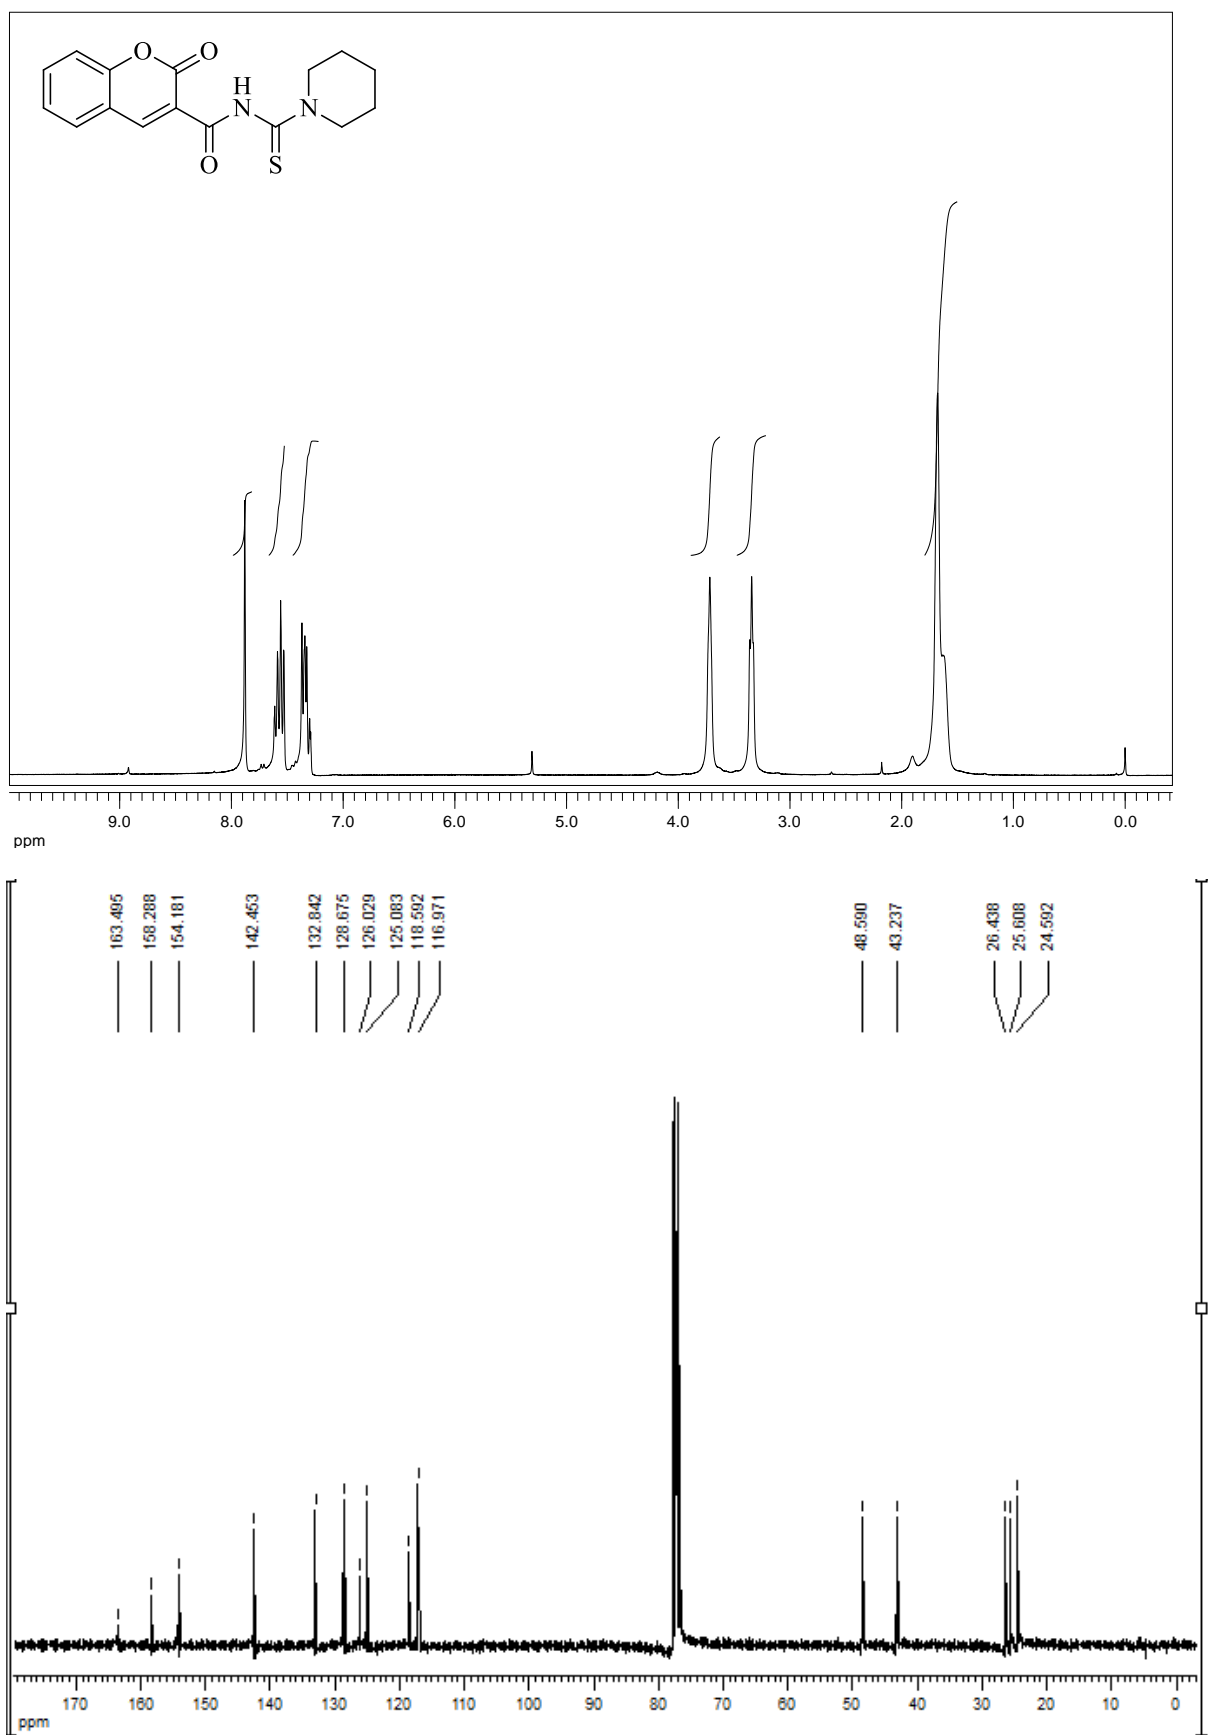

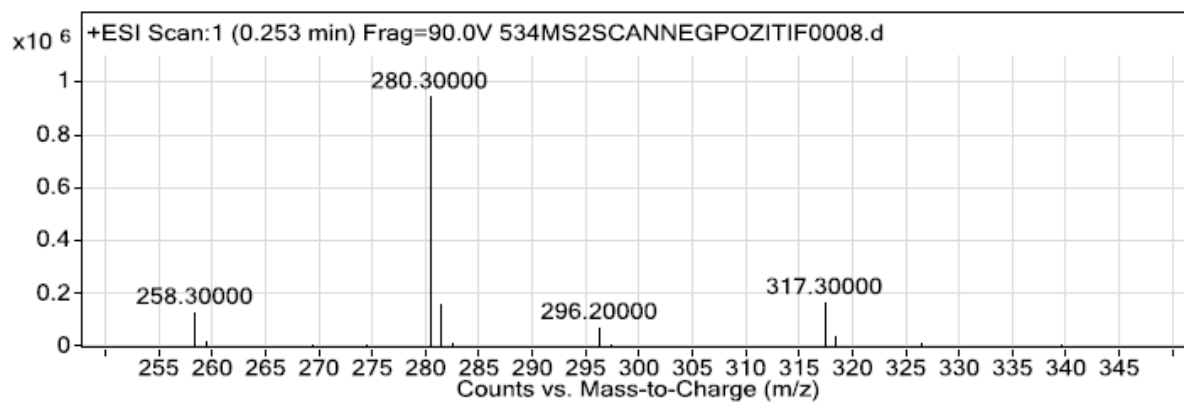

**S10:** <sup>1</sup>H NMR (CDCl<sub>3</sub>), <sup>13</sup>C NMR (CDCl<sub>3</sub>) and MS spectra of **e8**

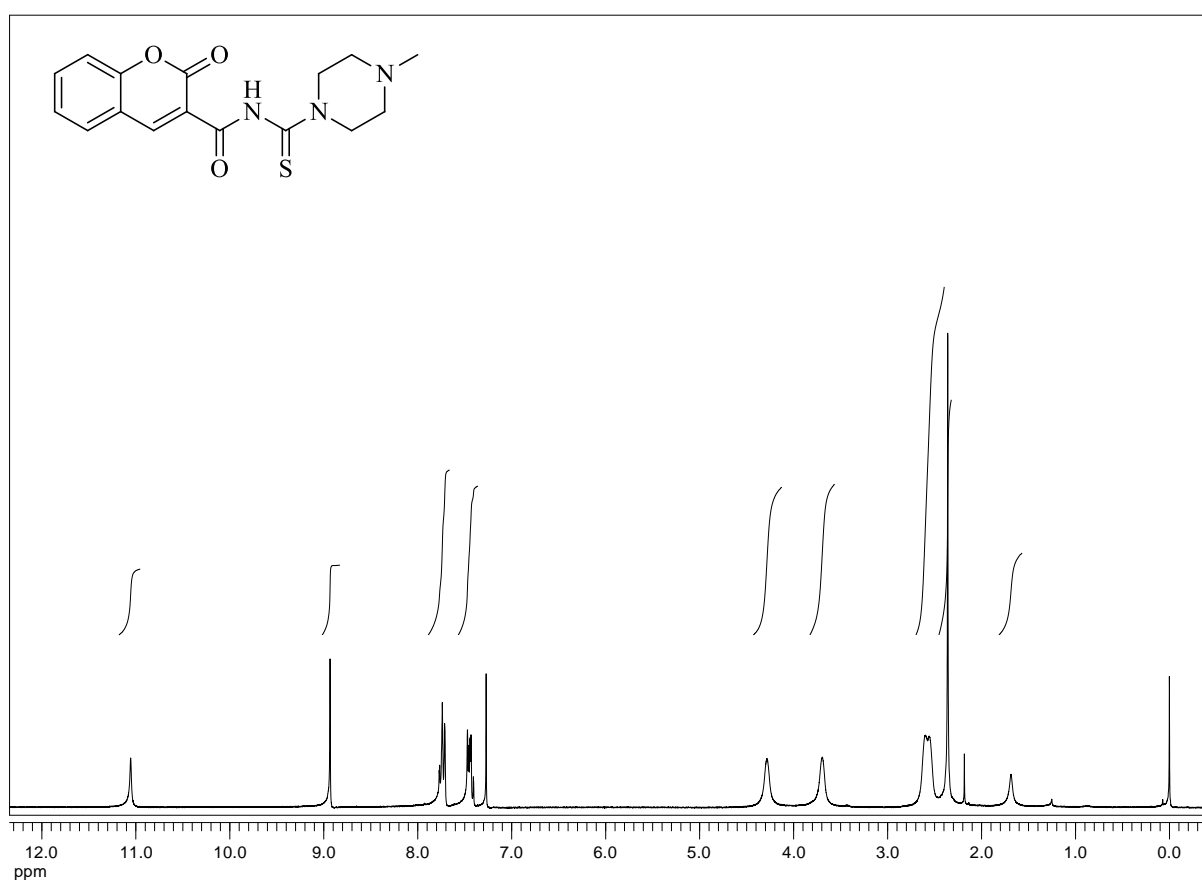

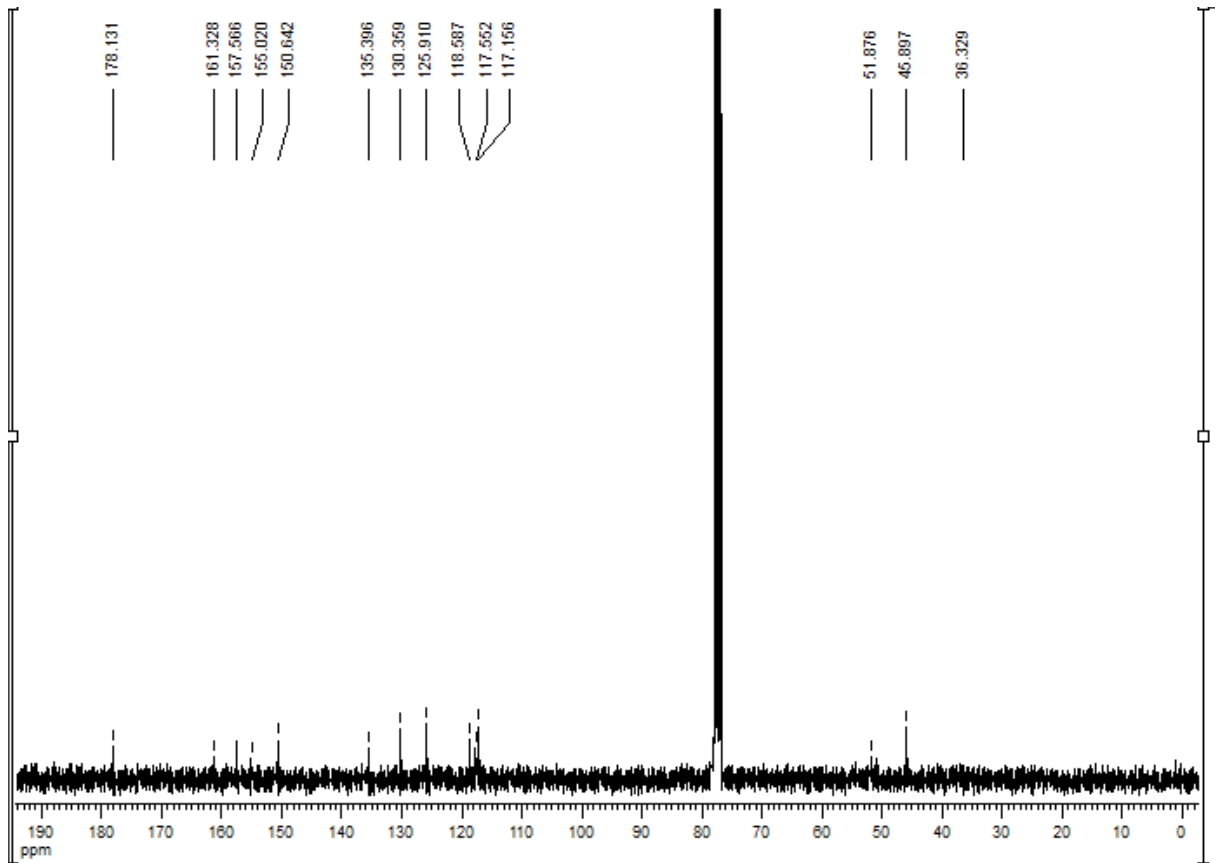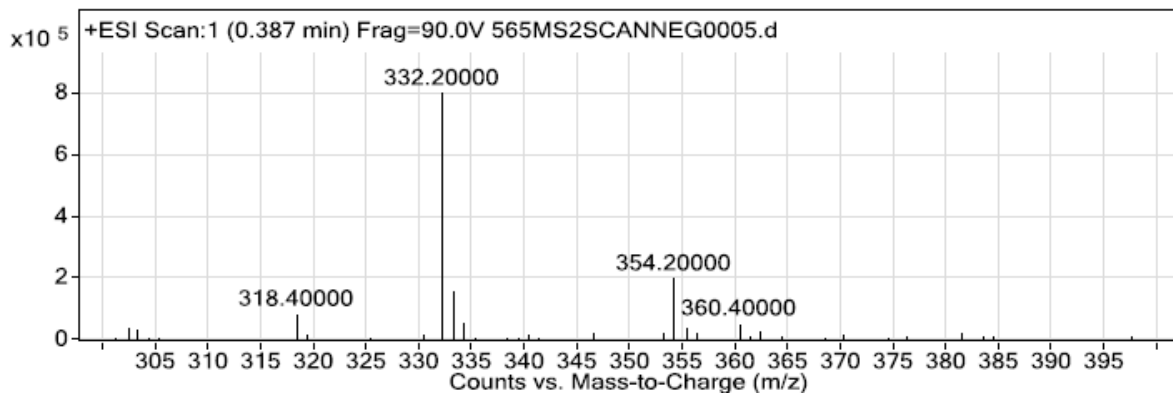



**S11:**  $^1\text{H}$  NMR ( $\text{CDCl}_3$ ),  $^{13}\text{C}$  NMR ( $\text{CDCl}_3$ ) and MS spectra of **e9**

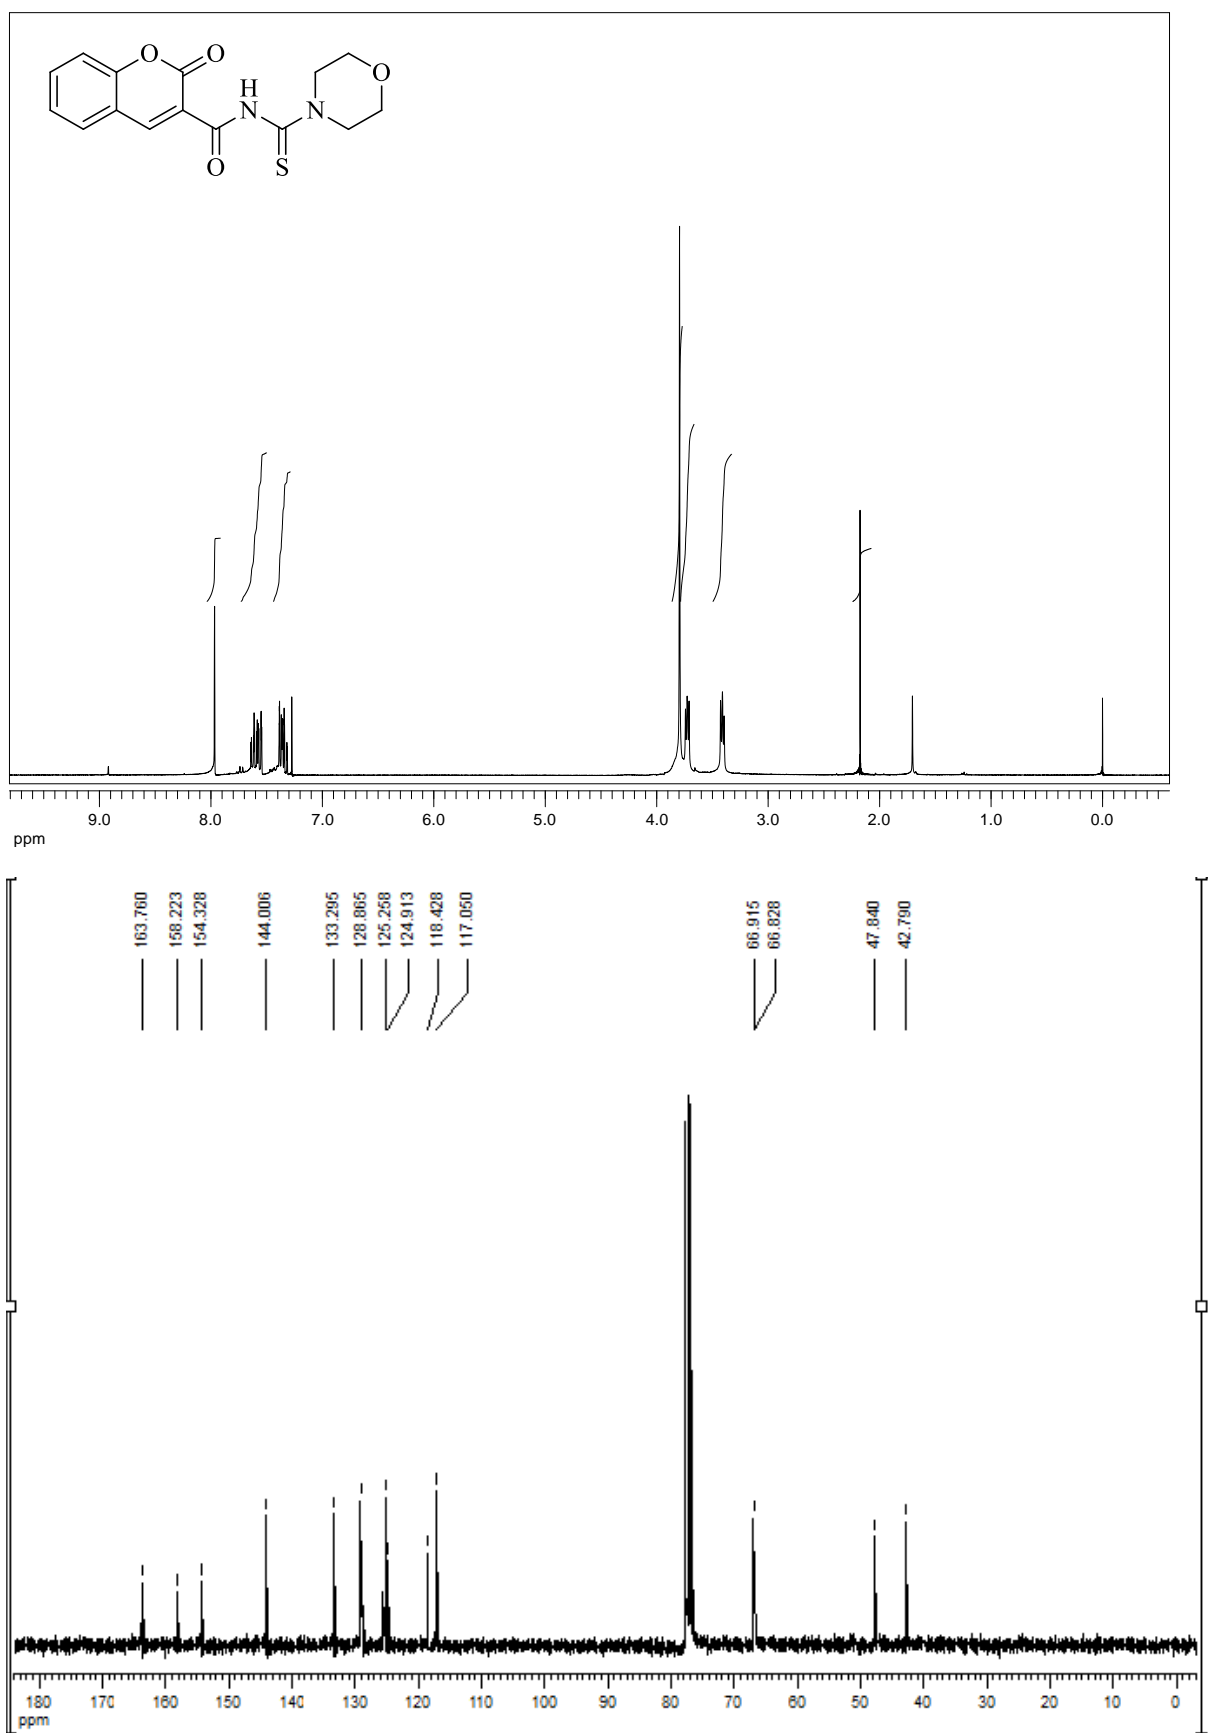

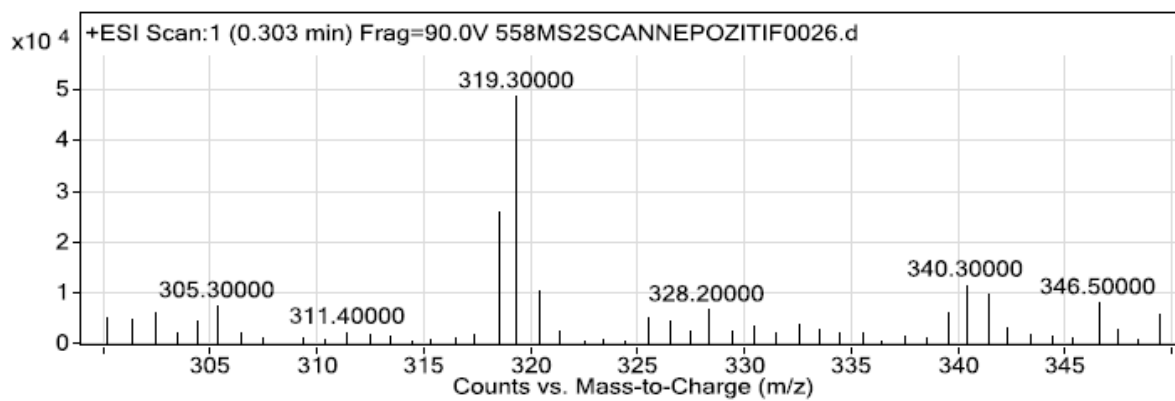

**S12:** <sup>1</sup>H NMR (CDCl<sub>3</sub>), <sup>13</sup>C NMR (CDCl<sub>3</sub>) and MS spectra of **e10**

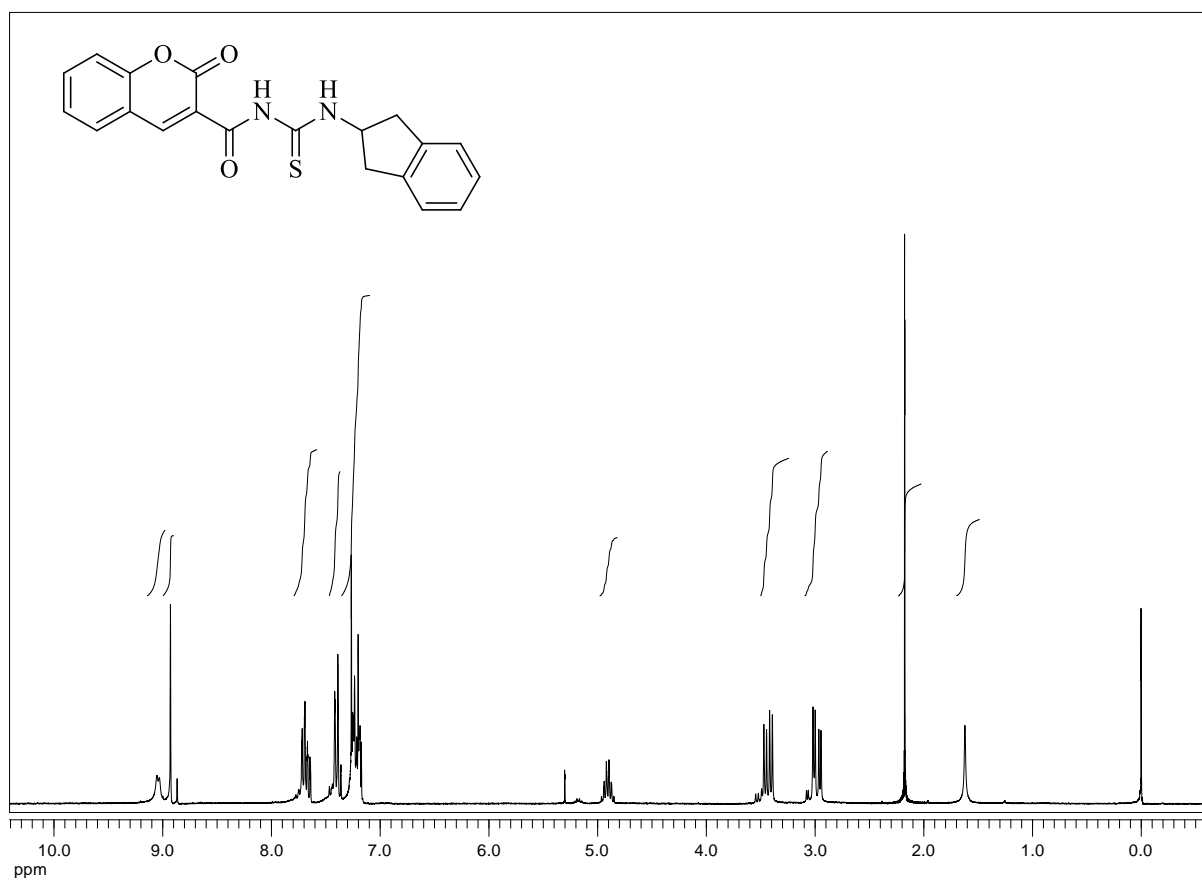

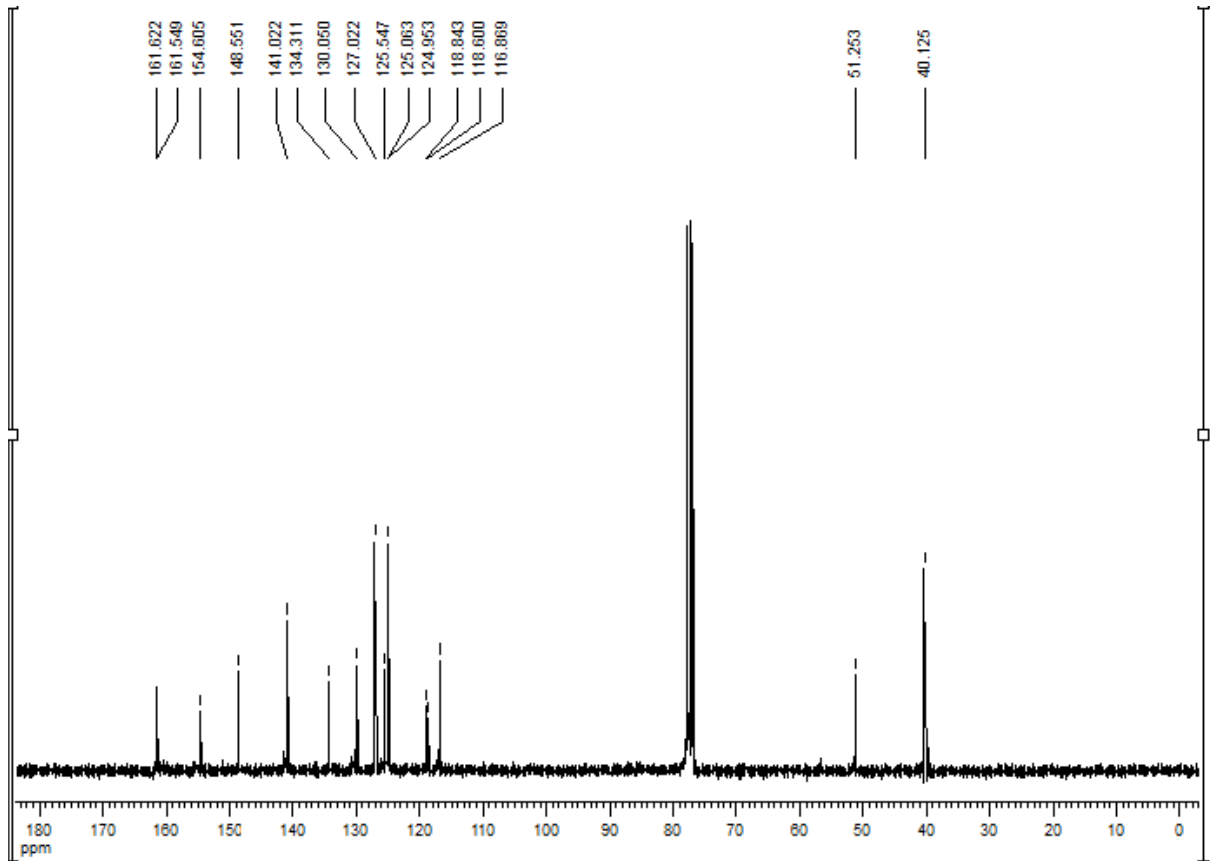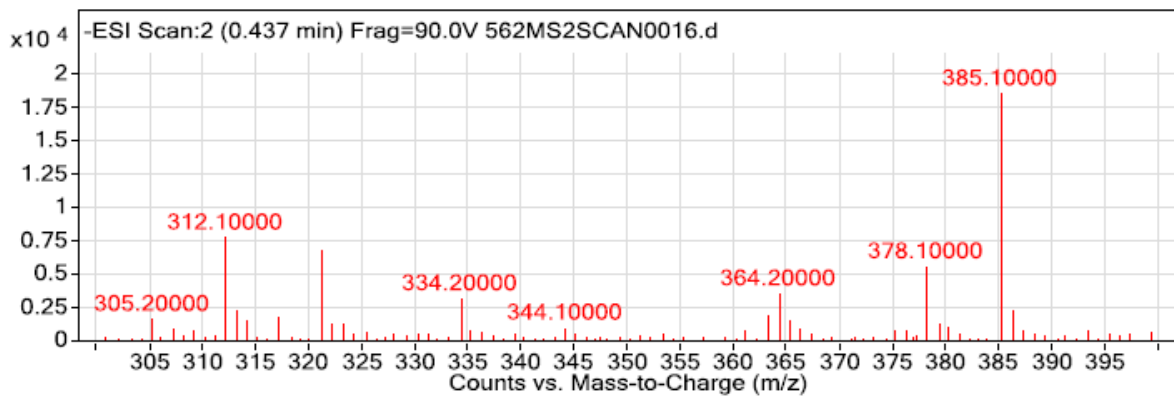

**S13:**  $^1\text{H}$  NMR ( $\text{CDCl}_3$ ),  $^{13}\text{C}$  NMR ( $\text{CDCl}_3$ ) and MS spectra of **e11**

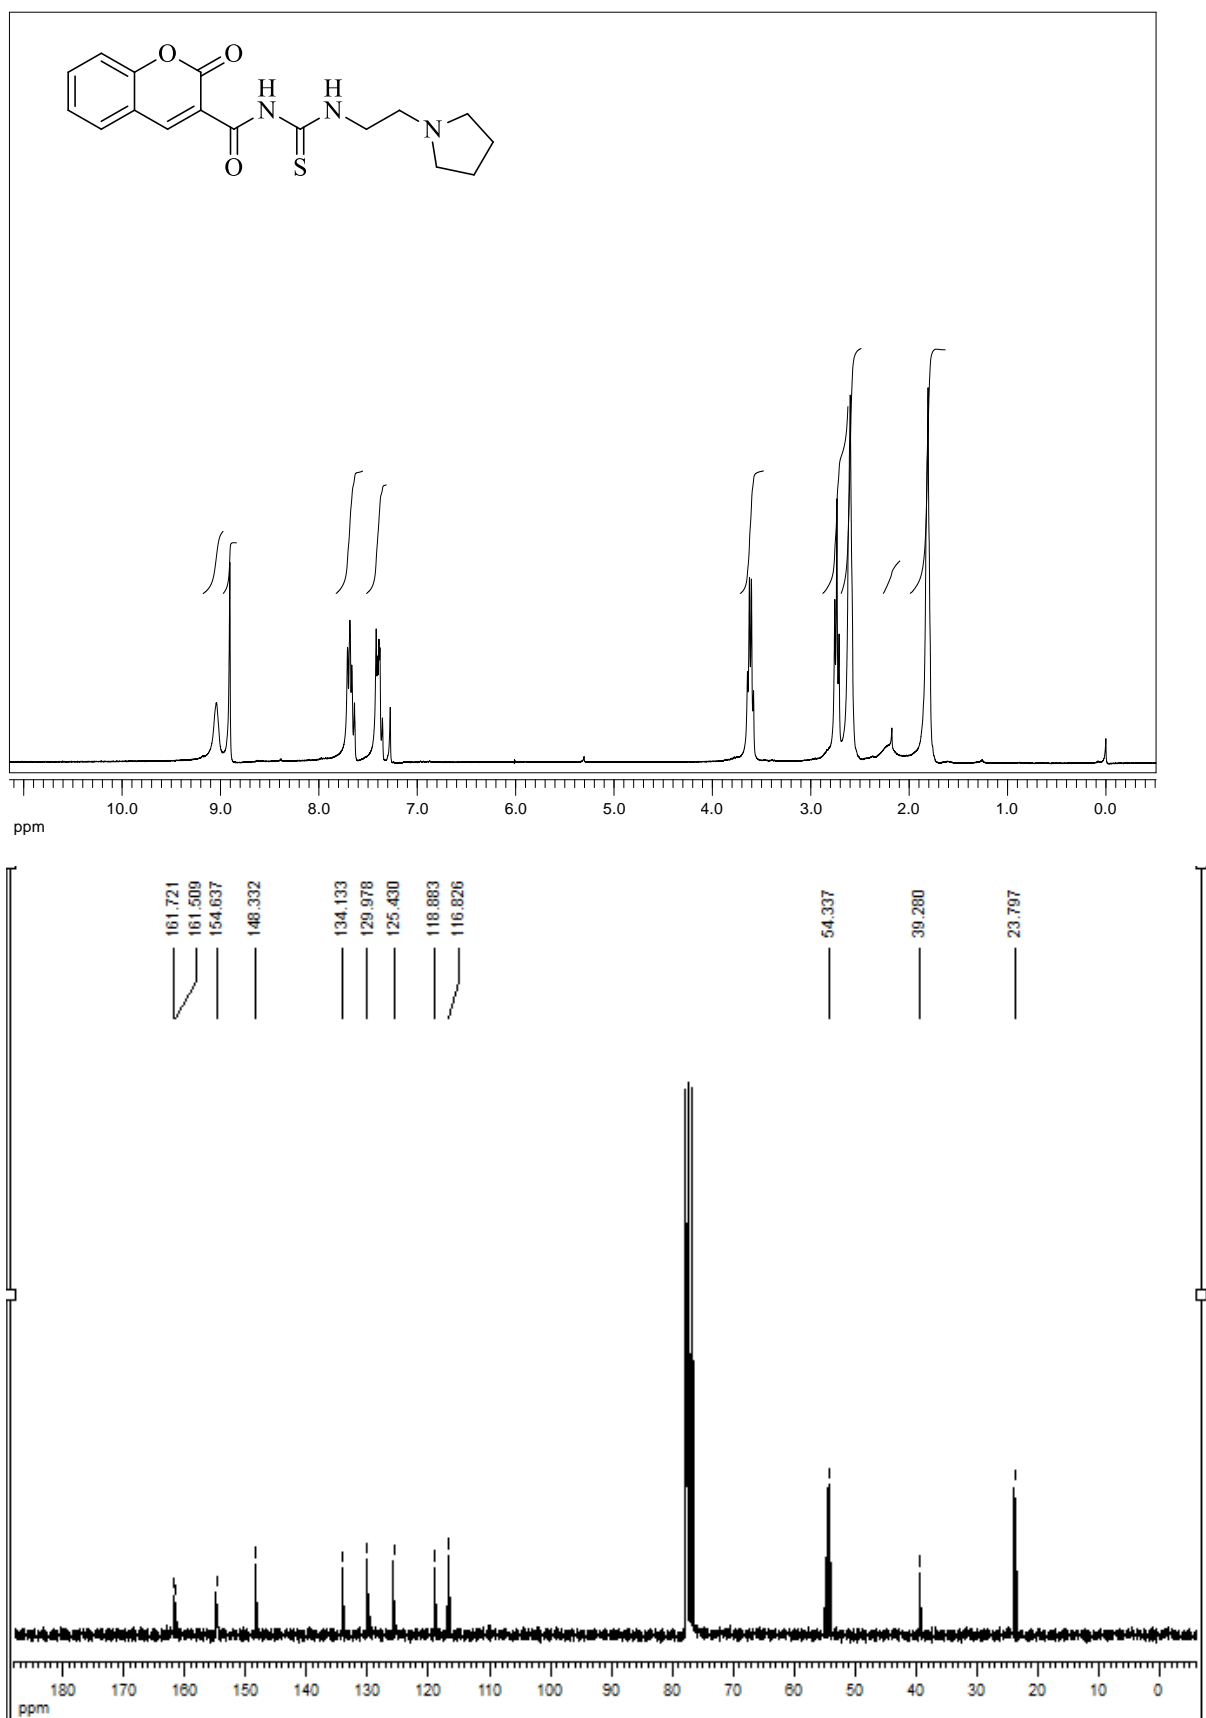

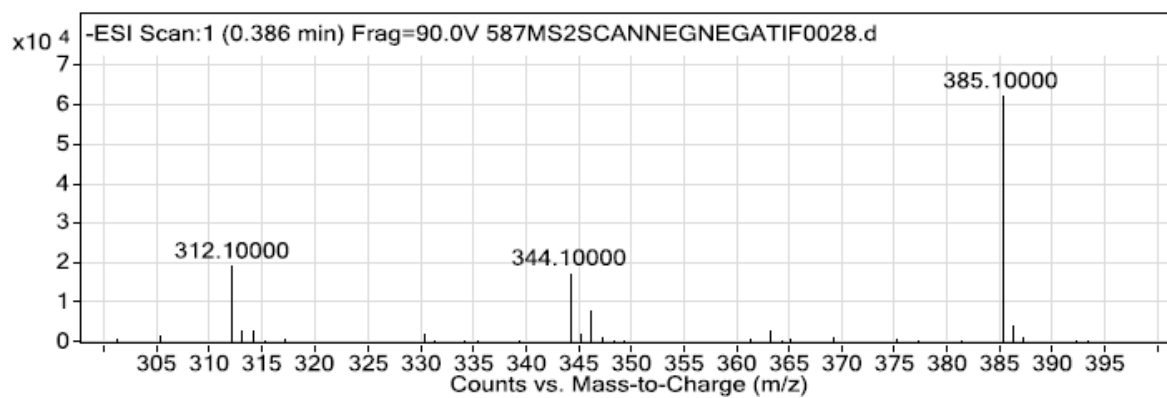

**S14:** <sup>1</sup>H NMR (CDCl<sub>3</sub>), <sup>13</sup>C NMR (CDCl<sub>3</sub>) and MS spectra of **e12**

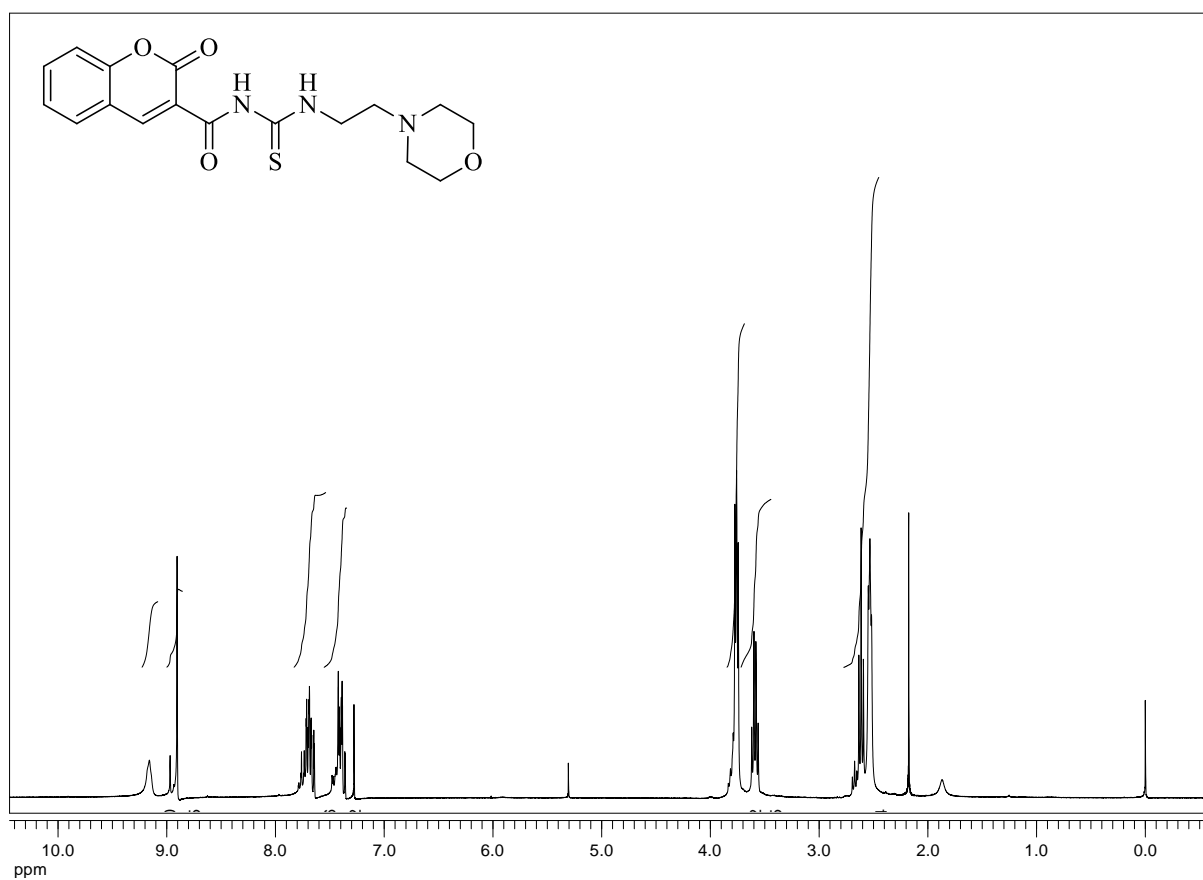

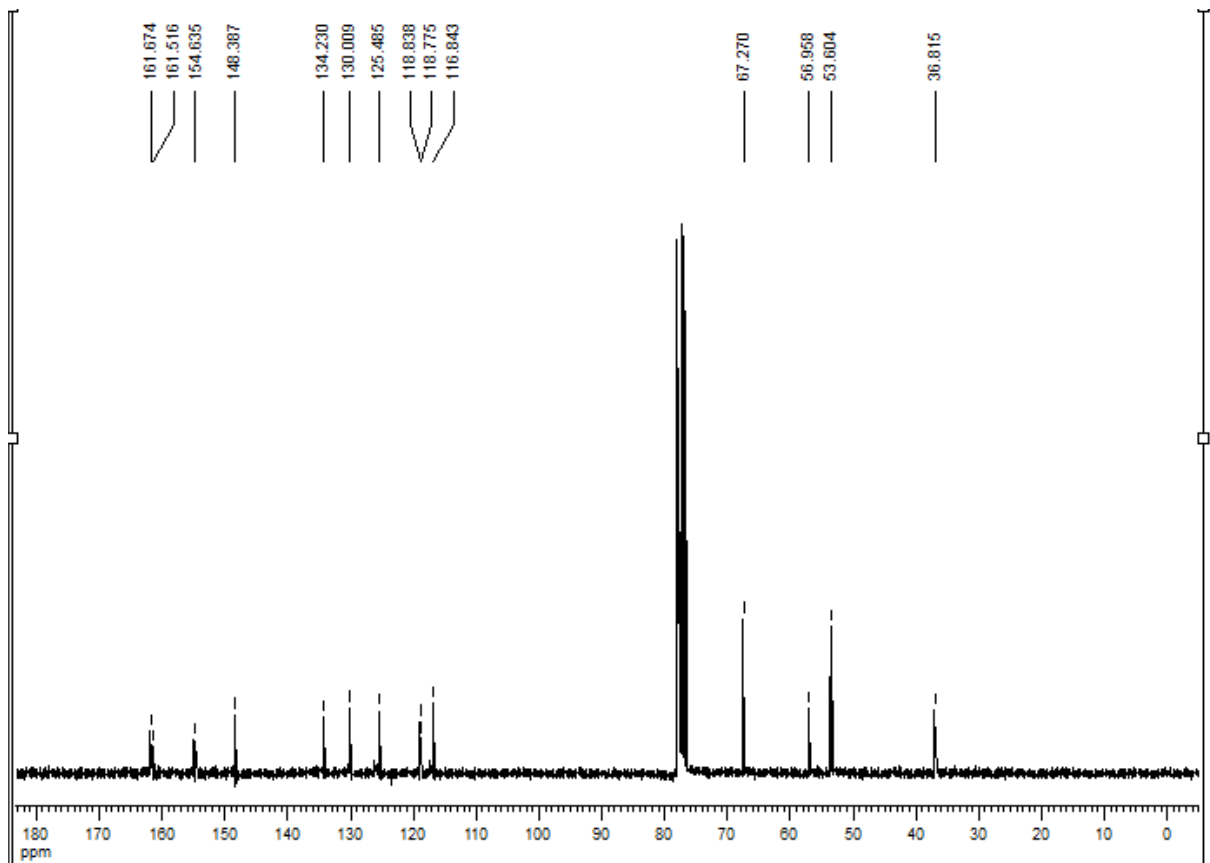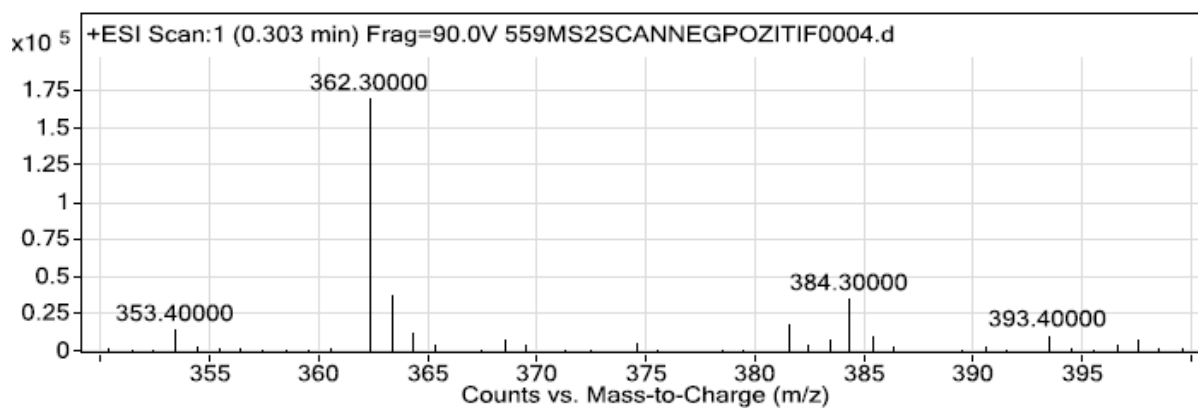

**S15:**  $^1\text{H}$  NMR ( $\text{CDCl}_3$ ),  $^{13}\text{C}$  NMR ( $\text{CDCl}_3$ ) and MS spectra of **e13**

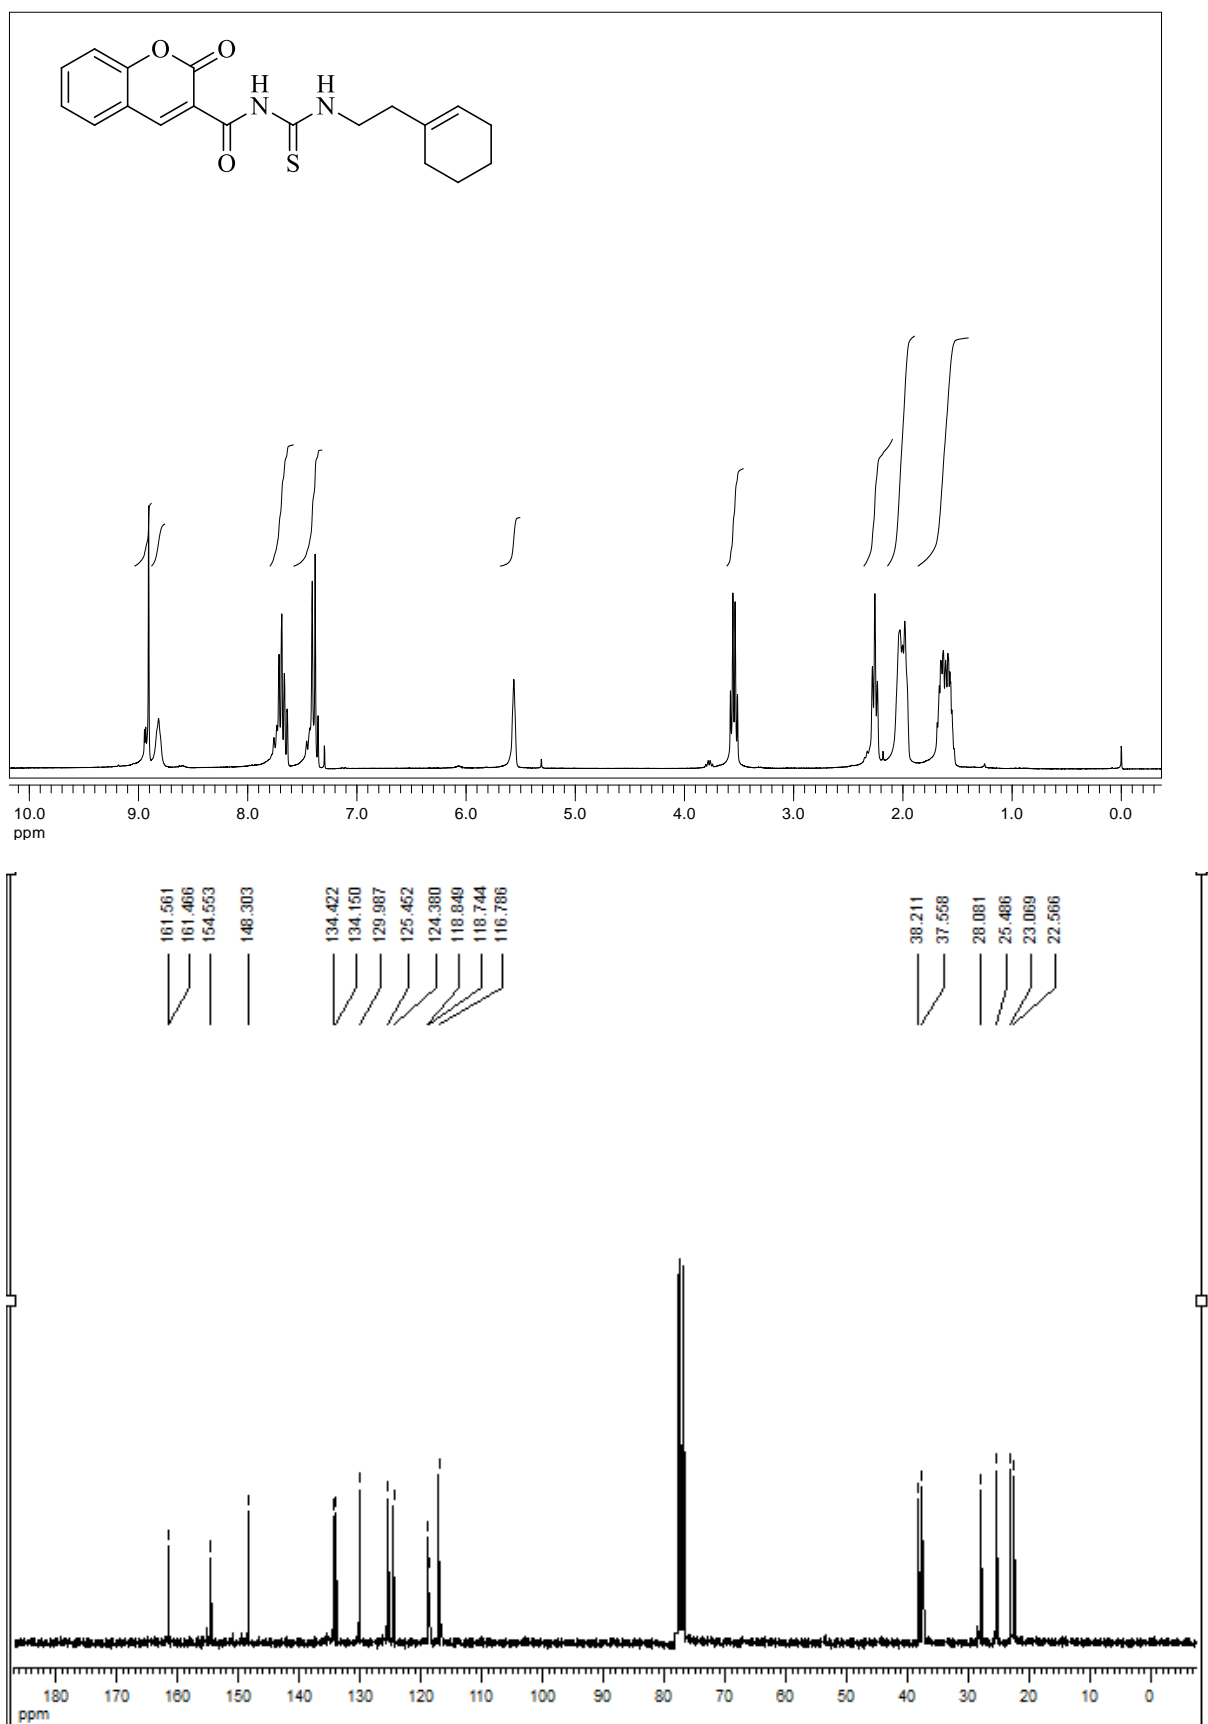

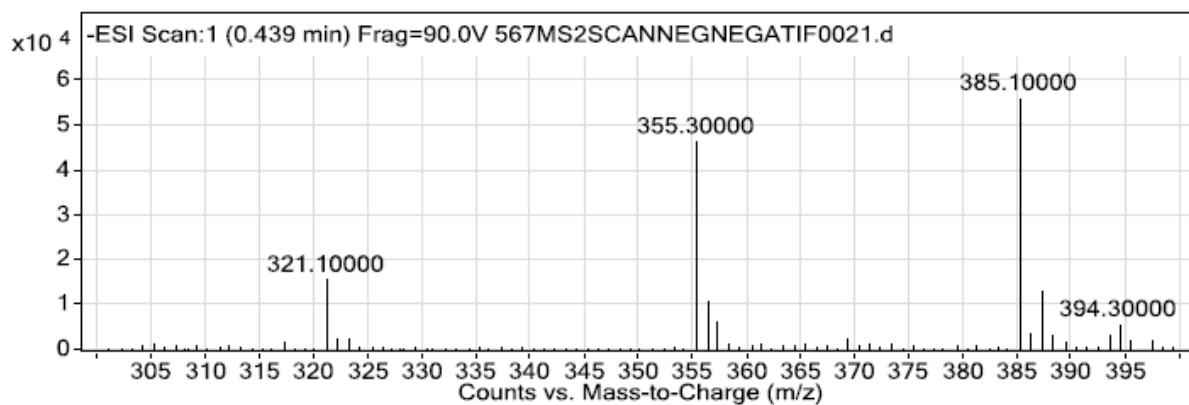

**S16:** <sup>1</sup>H NMR (CDCl<sub>3</sub>), <sup>13</sup>C NMR (CDCl<sub>3</sub>) and MS spectra of **e14**

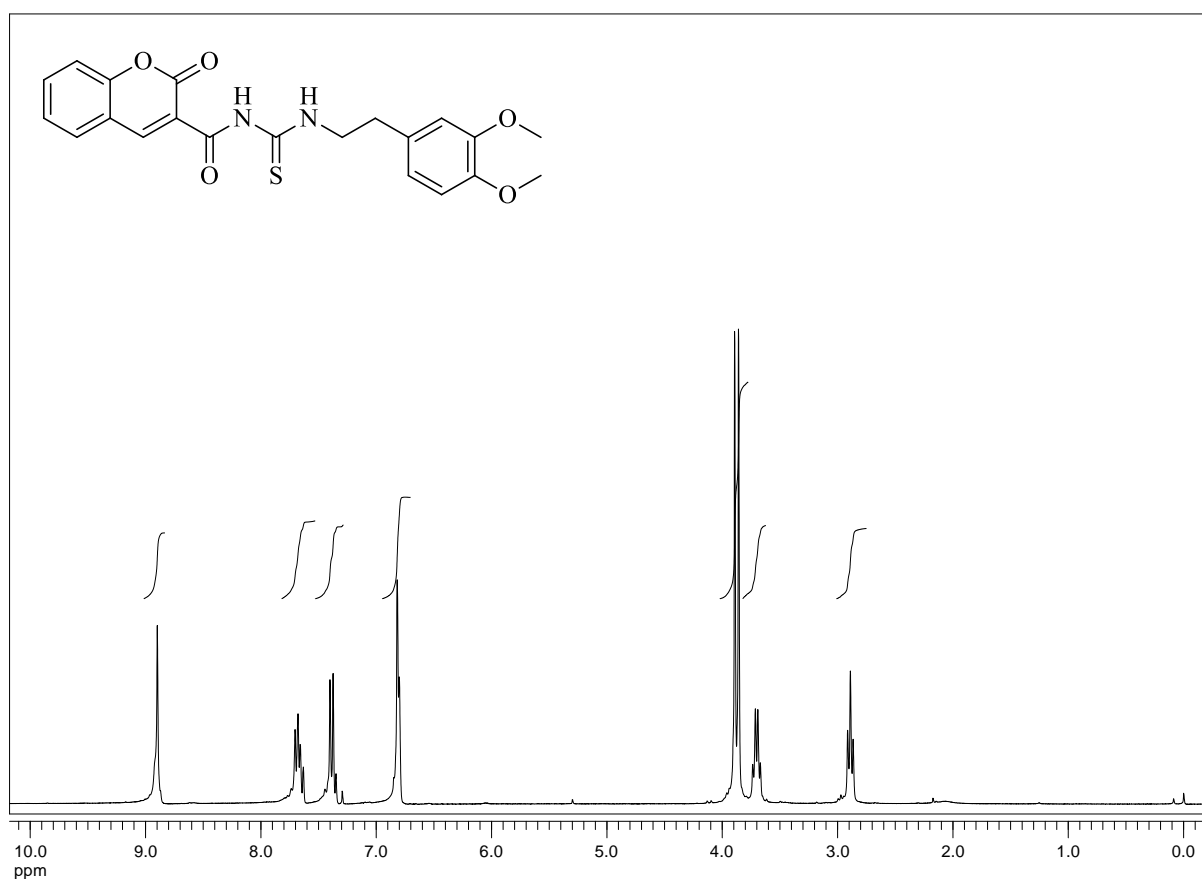



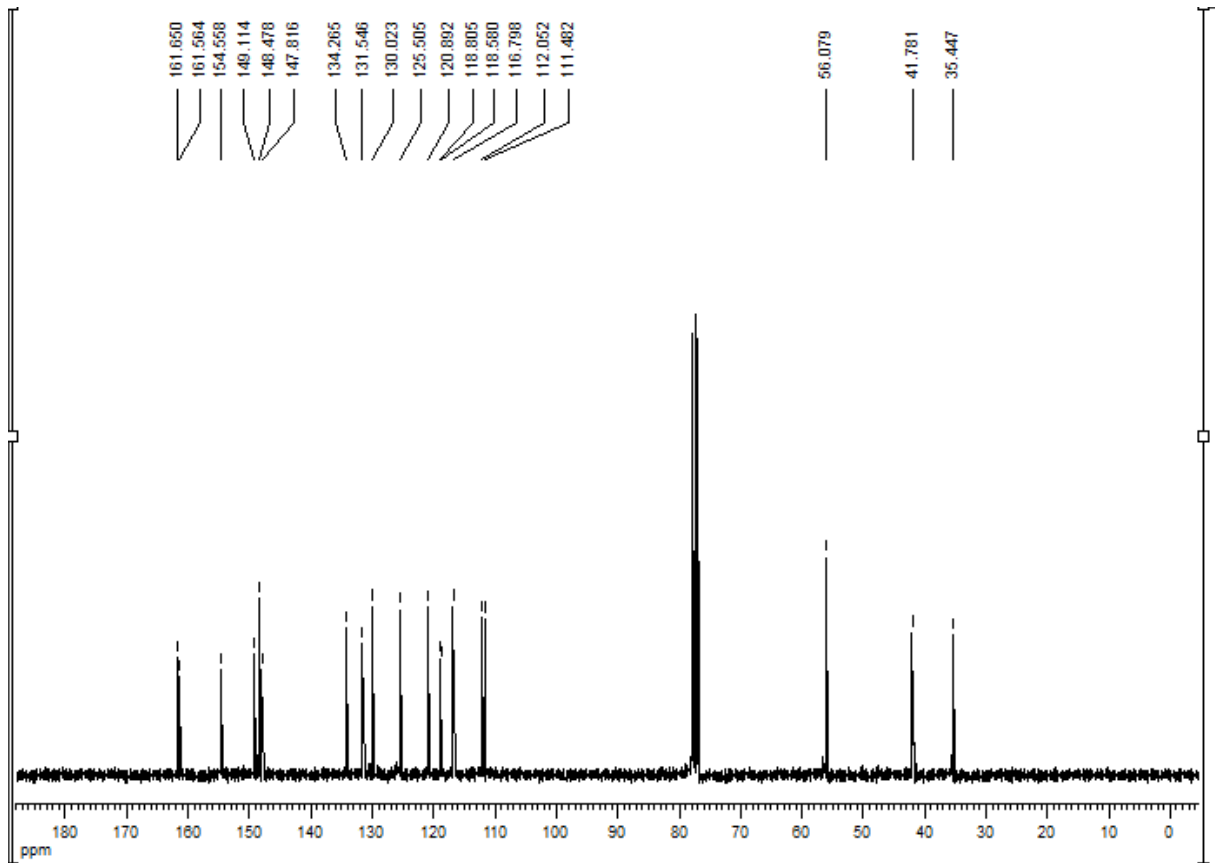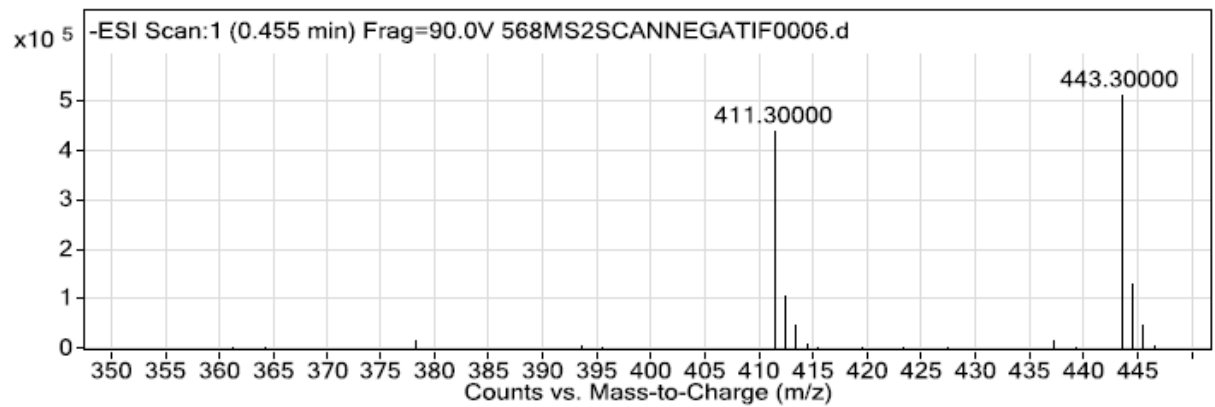

**S17:**  $^1\text{H}$  NMR ( $\text{CDCl}_3$ ),  $^{13}\text{C}$  NMR ( $\text{CDCl}_3$ ) and MS spectra of **e15**

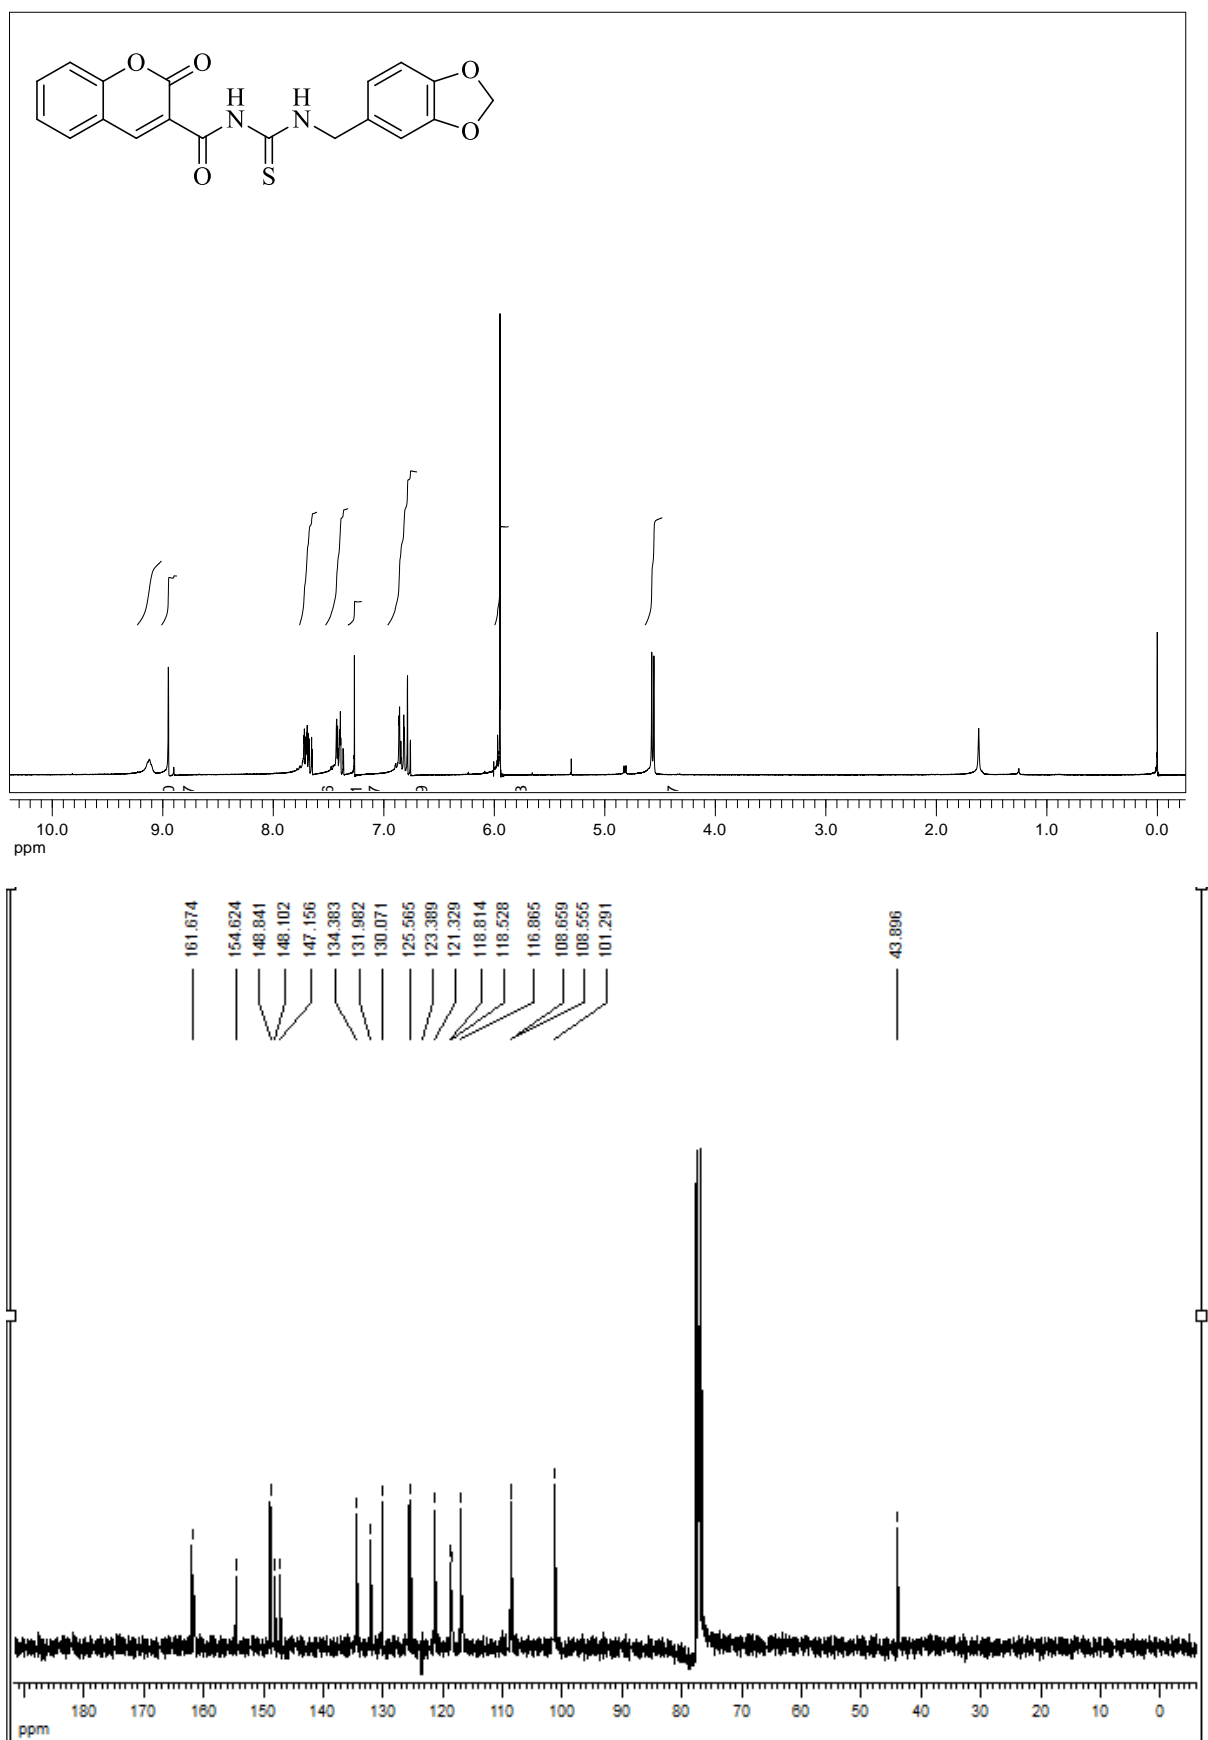

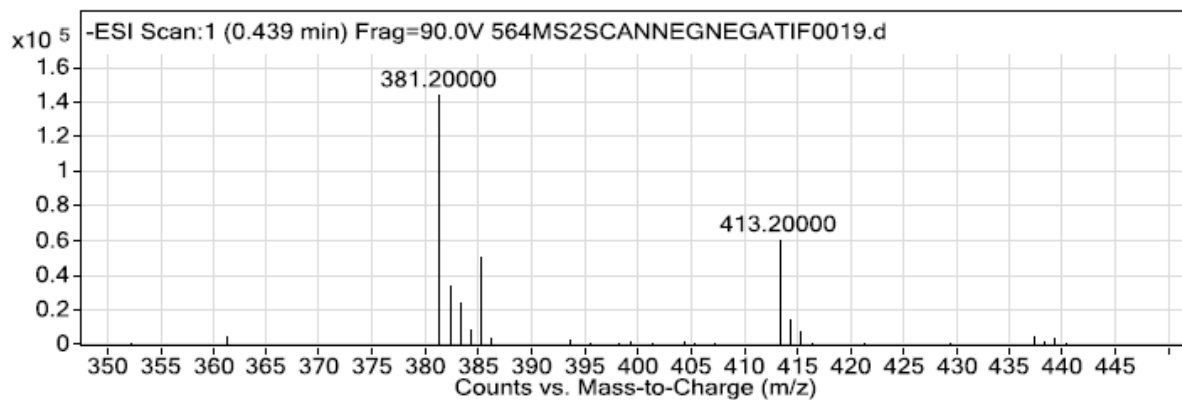

**S18:** <sup>1</sup>H NMR (CDCl<sub>3</sub>), <sup>13</sup>C NMR (CDCl<sub>3</sub>) and MS spectra of **e16**

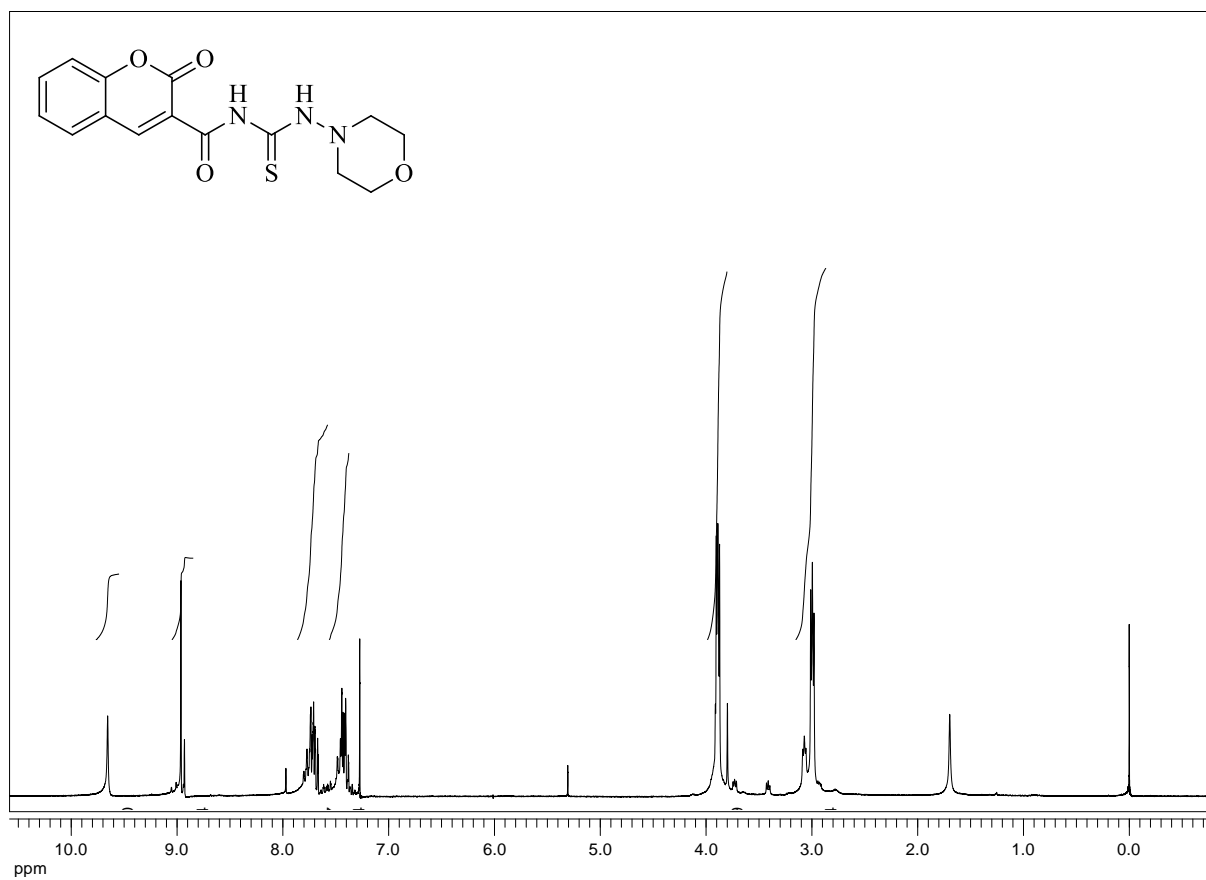

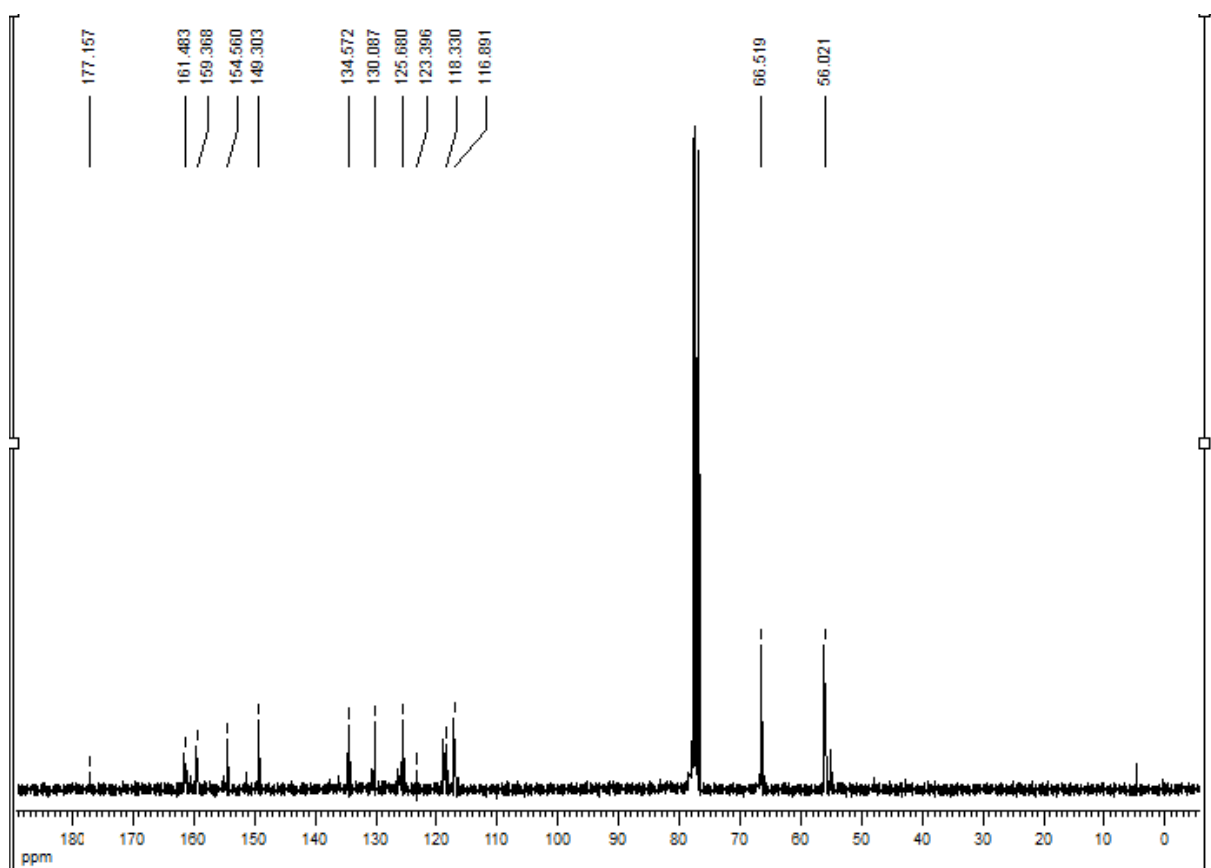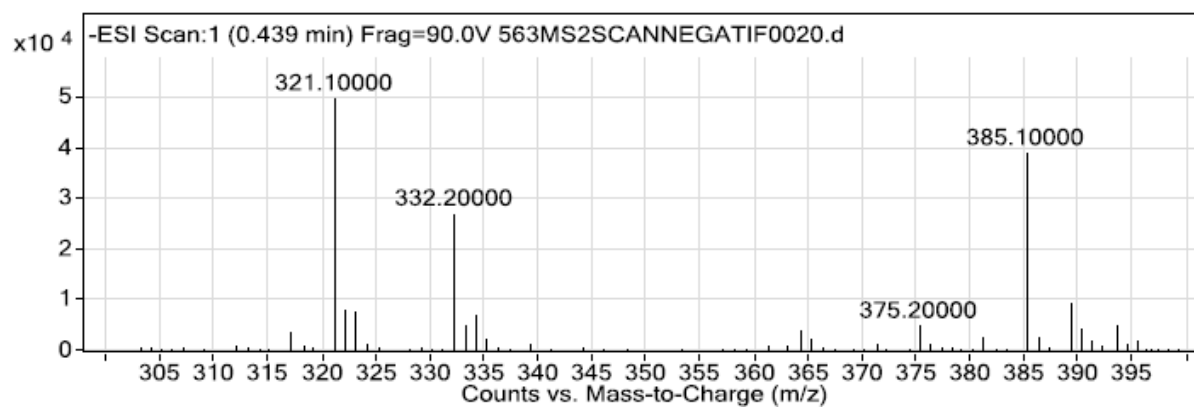

**S19:**  $^1\text{H}$  NMR ( $\text{CDCl}_3$ ),  $^{13}\text{C}$  NMR ( $\text{CDCl}_3$ ) and MS spectra of **e17**

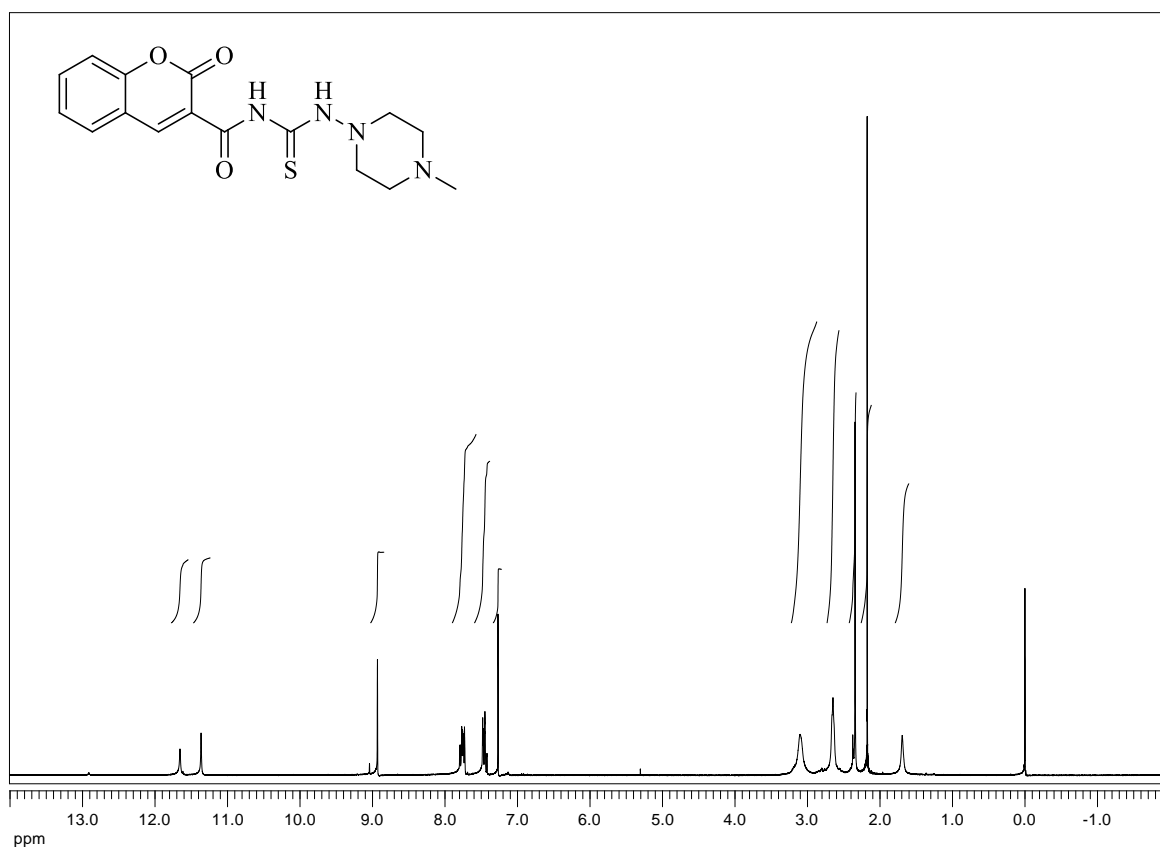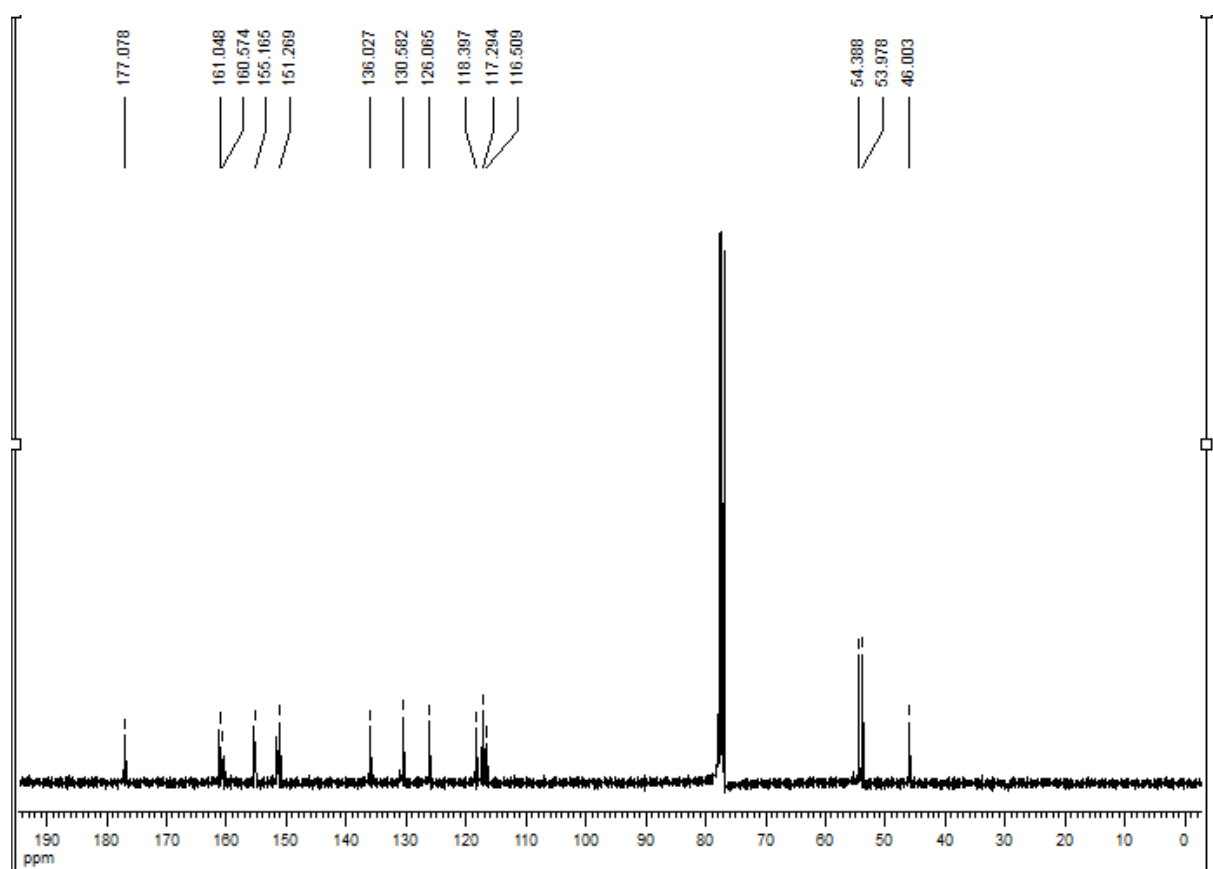

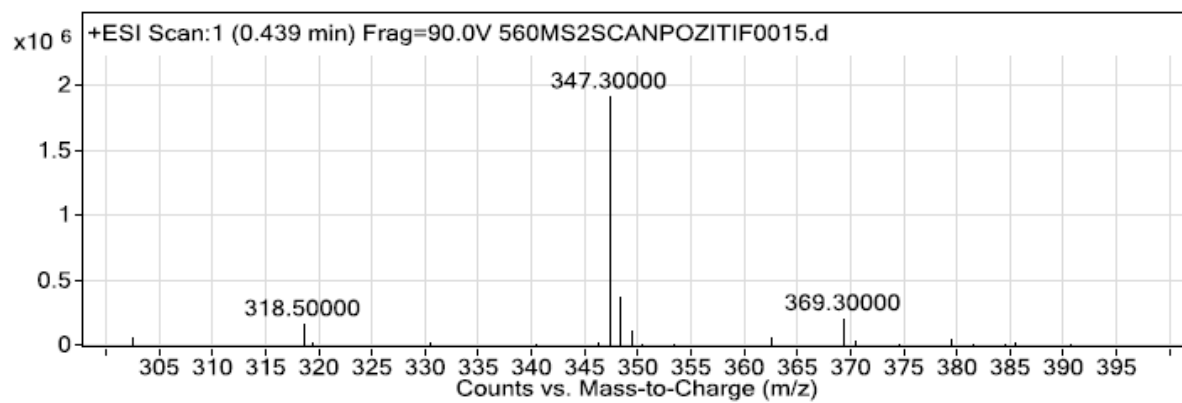

**S20:** <sup>1</sup>H NMR (CDCl<sub>3</sub>), <sup>13</sup>C NMR (CDCl<sub>3</sub>) and MS spectra of **e18**

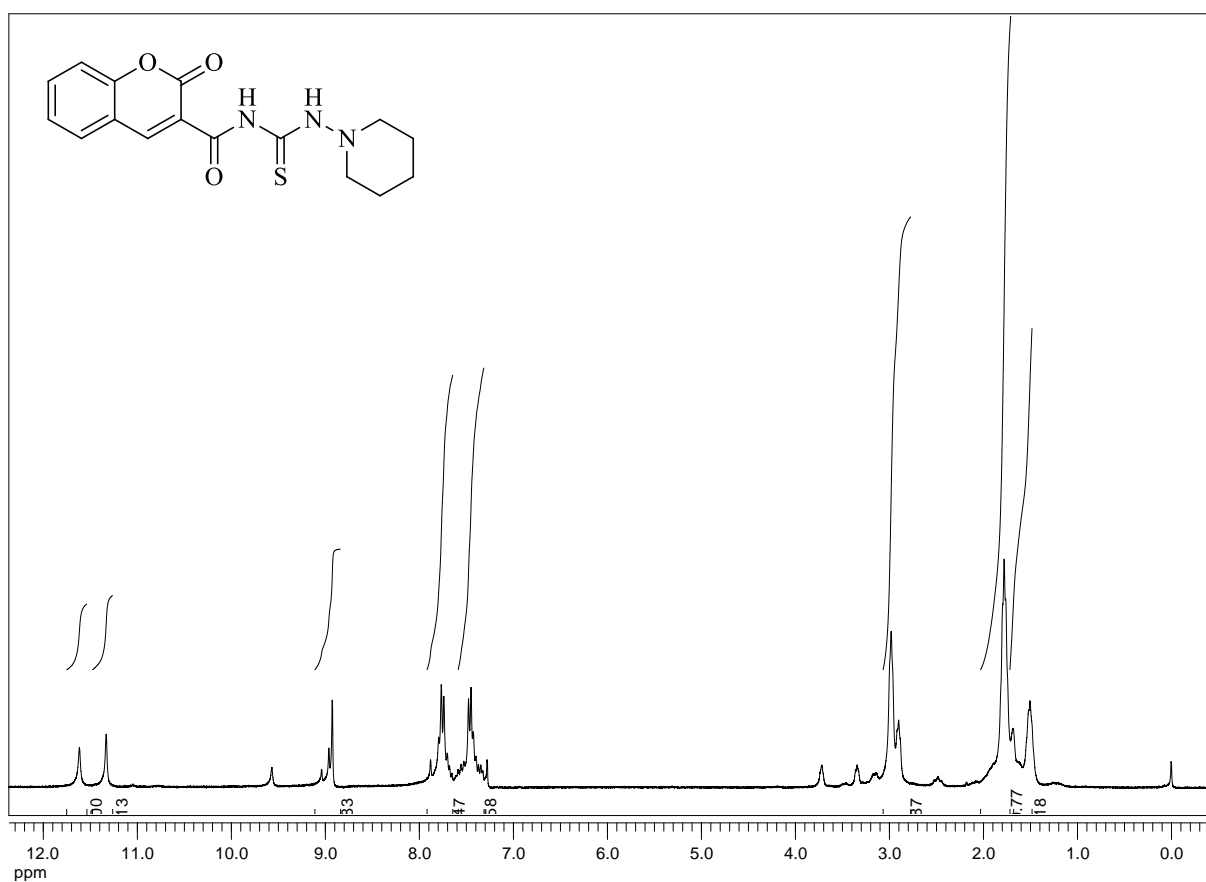

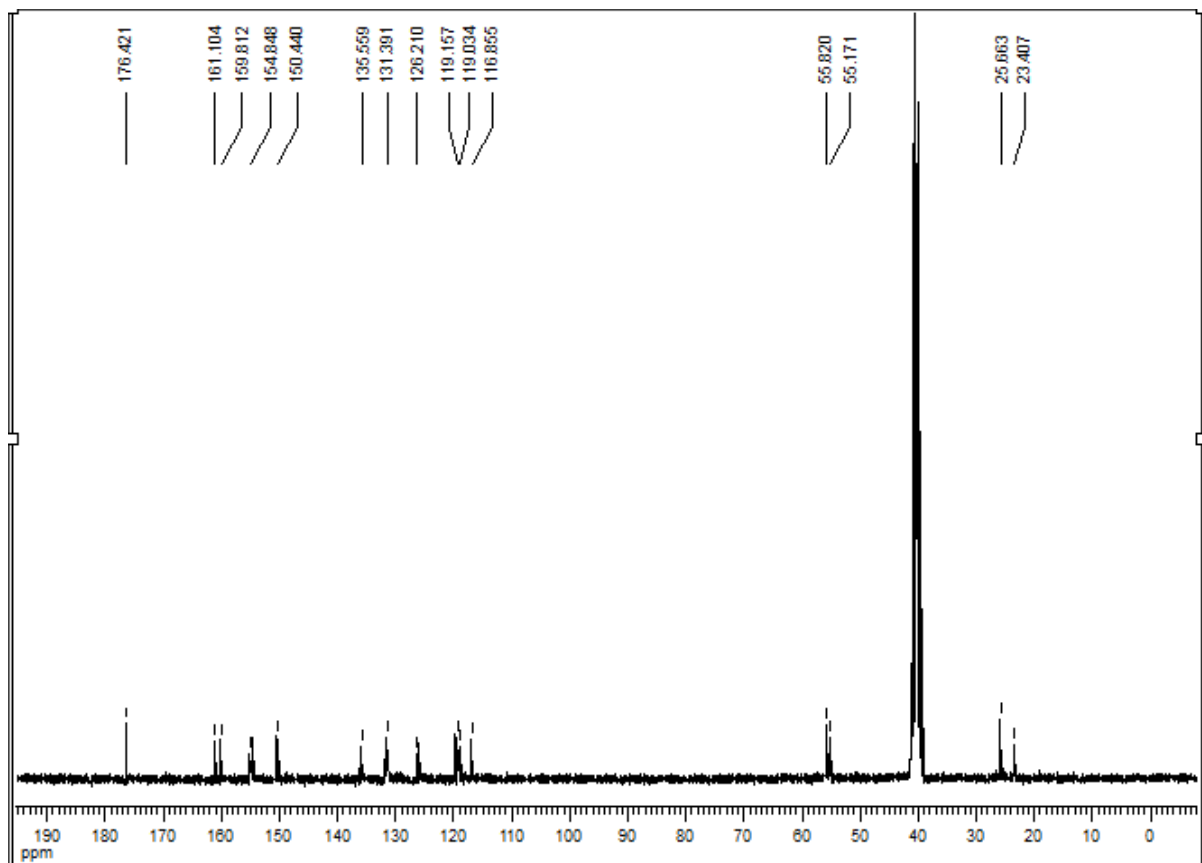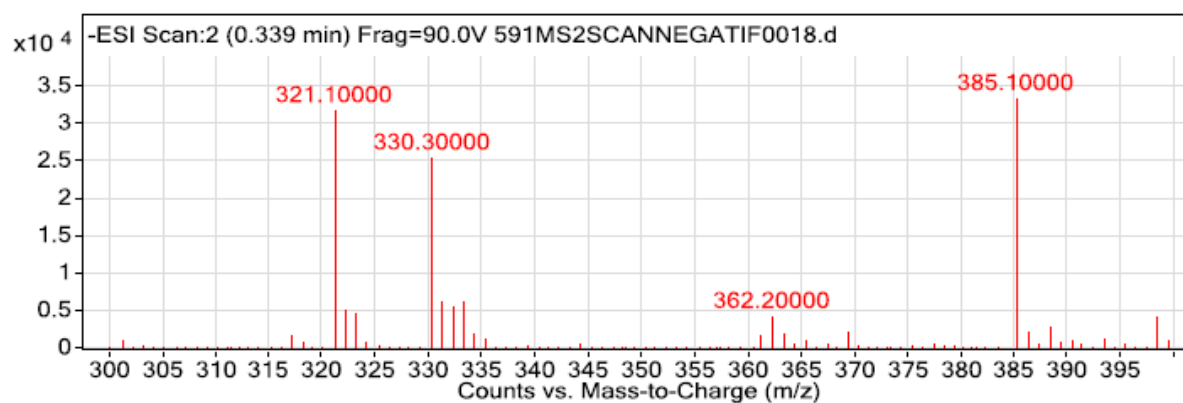

**S21:**  $^1\text{H}$  NMR ( $\text{CDCl}_3$ ),  $^{13}\text{C}$  NMR ( $\text{CDCl}_3$ ) and MS spectra of **e19**

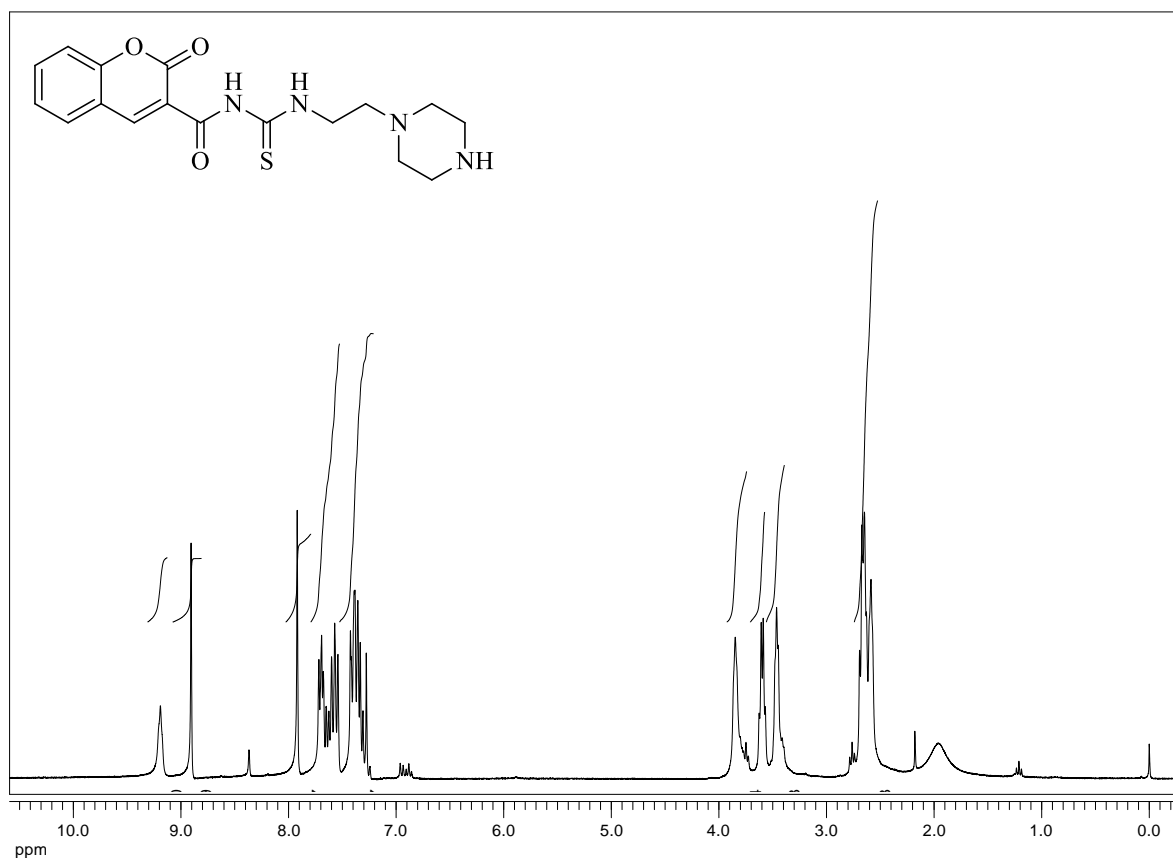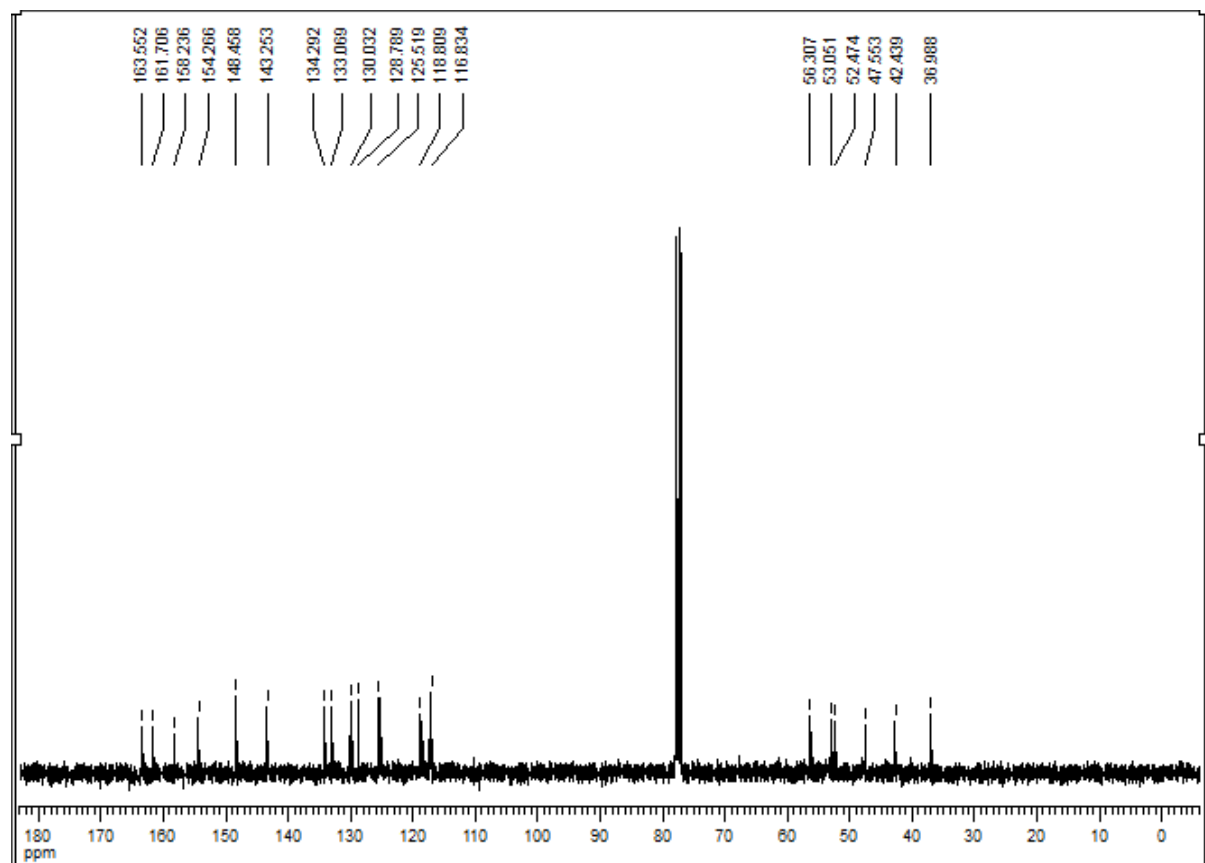



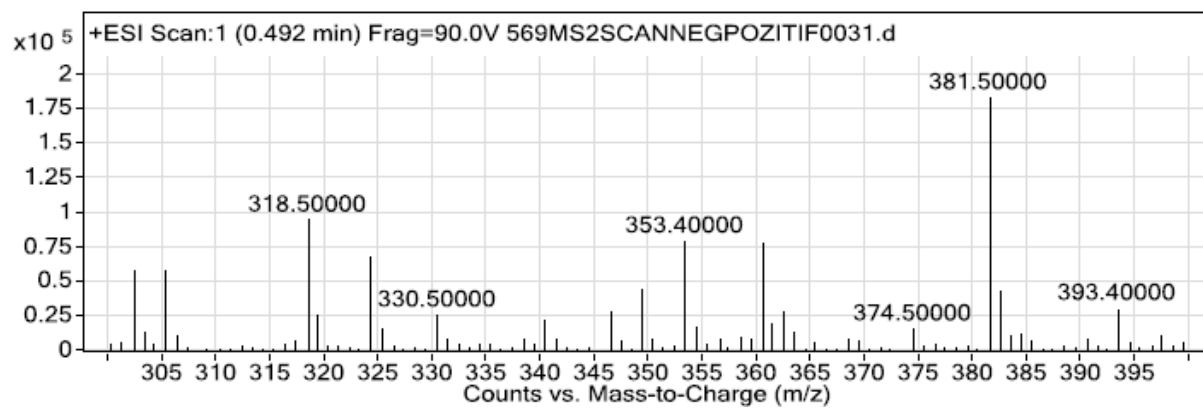

**S22:** <sup>1</sup>H NMR (CDCl<sub>3</sub>), <sup>13</sup>C NMR (CDCl<sub>3</sub>) and MS spectra of **e20**

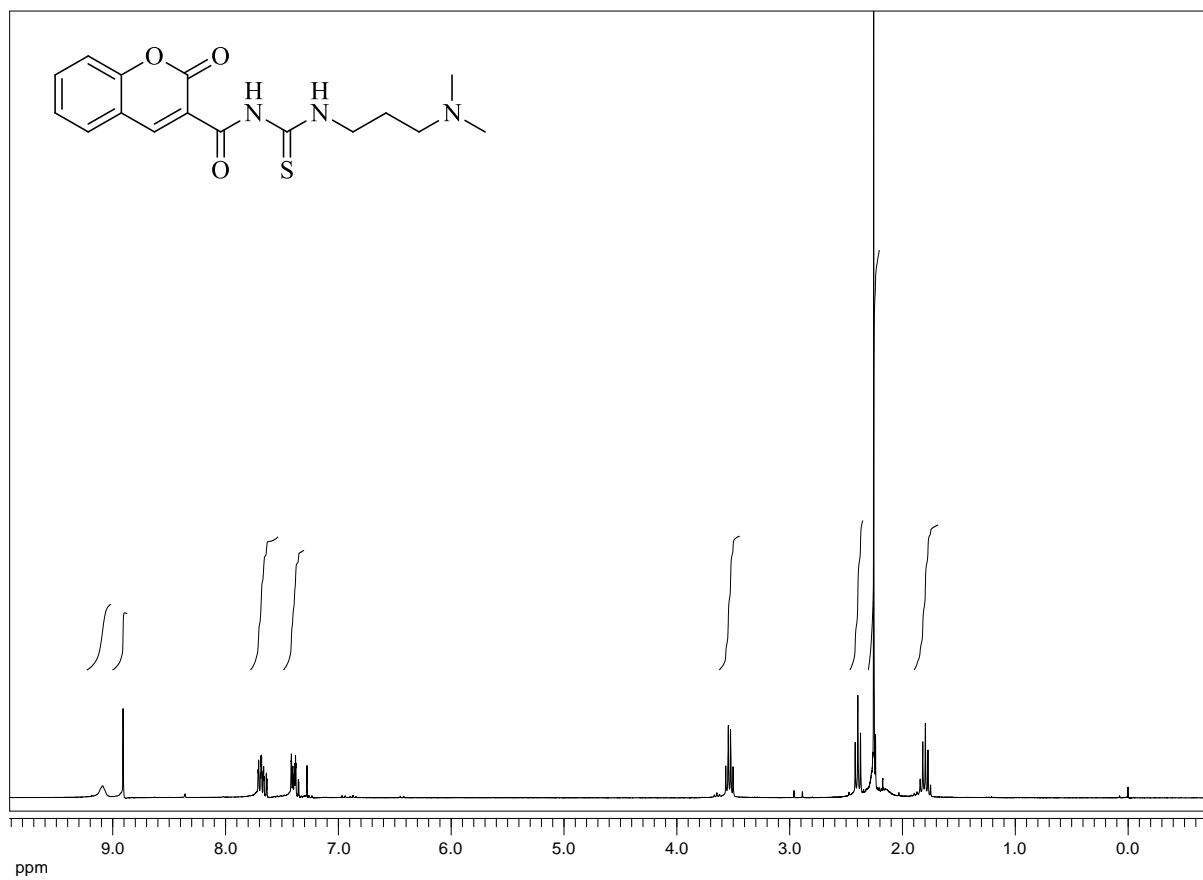

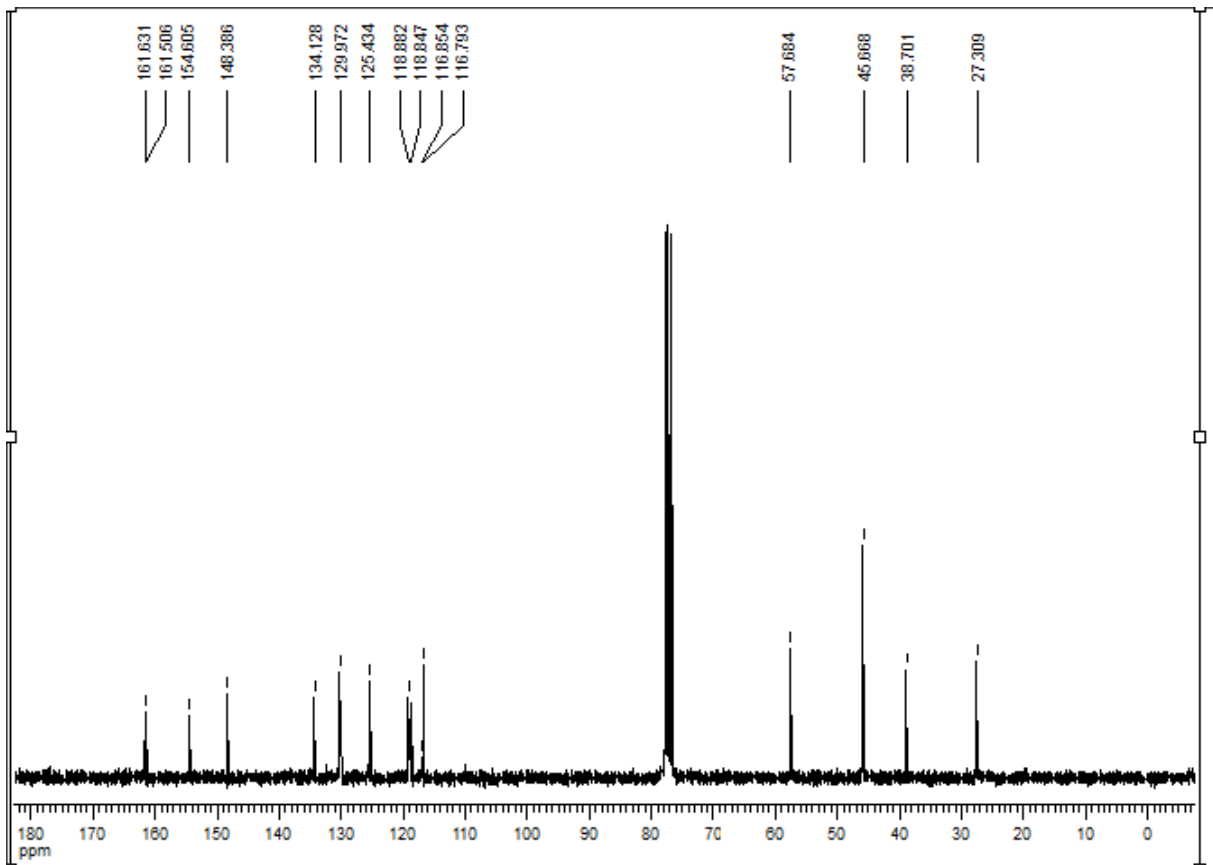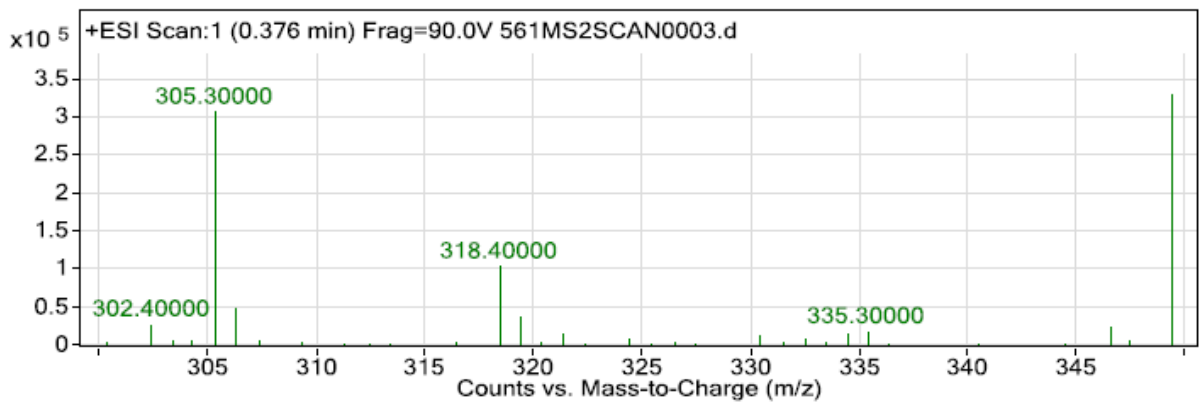

Supplement: IENZ_A_1354857_SM1543.pdf [file IENZ_A_1354857_SM1543.pdf]
